# An efficient extension of N-mixture models for multi-species abundance estimation

Juan Pablo Gomez<sup>1,2,3,4\*</sup>, Scott K. Robinson<sup>2</sup>, Jason K. Blackburn<sup>3,4</sup>,  
and José Miguel Ponciano<sup>1,\*</sup>

<sup>1</sup>Department of Biology, University of Florida, Gainesville, Florida

<sup>2</sup>Florida Museum of Natural History, Gainesville, Florida

<sup>3</sup>Spatial Epidemiology and Ecology Research Laboratory, Department  
of Geography, University of Florida, Gainesville Florida

<sup>4</sup>Emerging Pathogens Institute, University of Florida, Gainesville,  
Florida

\* *Correspondence author*

## Abstract

1  
2 1. In this study we propose an extension of the N-mixture family of models  
3 that targets an improvement of the statistical properties of rare species abun-  
4 dance estimators when sample sizes are low, yet typical size for tropical studies.  
5 The proposed method harnesses information from other species in an ecological  
6 community to correct each species' estimator. We provide guidance to deter-  
7 mine the sample size required to estimate accurately the abundance of rare  
8 tropical species when attempting to estimate the abundance of single species.

9           2. We evaluate the proposed methods using an assumption of 50-m radius  
10 plots and perform simulations comprising a broad range of sample sizes, true  
11 abundances and detectability values and a complex data generating process.  
12 The extension of the N-mixture model is achieved by assuming that the de-  
13 tection probabilities of a set of species are all drawn at random from a beta  
14 distribution in a multi-species fashion. This hierarchical model avoids having  
15 to specify a single detection probability parameter per species in the targeted  
16 community. Parameter estimation is done via Maximum Likelihood.

17           3. We compared our multi-species approach with previously proposed multi-  
18 species N-mixture models, which we show are biased when the true densities  
19 of species in the community are less than seven individuals per 100-ha. The  
20 beta N-mixture model proposed here outperforms the traditional Multi-species  
21 N-mixture model by allowing the estimation of organisms at lower densities  
22 and controlling the bias in the estimation.

23           4. We illustrate how our methodology can be used to suggest sample sizes  
24 required to estimate the abundance of organisms, when these are either rare,  
25 common or abundant. When the interest is full communities, we show how  
26 the multi-species approaches, and in particular our beta model and estimation  
27 methodology, can be used as a practical solution to estimate organism densities  
28 from rapid inventory datasets. The statistical inferences done with our model  
29 via Maximum Likelihood can also be used to group species in a community  
30 according to their detectabilities.

31 **Keywords:** Maximum Likelihood estimation, Rare species, Sample Size Estimation,  
32 Community Abundance Models, Tropical Species, Hierarchical models, Data Cloning.

## 33 1 Introduction

34 Unbiased abundance and occupancy estimates are of paramount value for making in-  
35 ferences about ecological processes and making sound conservation decisions (Hubbell,  
36 2001; Leibold *et al.*, 2004; Margules & Pressey, 2000). To date, quantitative ecologists  
37 have proposed several statistical methods to estimate species' detection probabilities  
38 and use these to correct occupancy or abundance estimates (Denes *et al.*, 2015). Our  
39 study was motivated by the attempt to use these novel models to estimate the abun-  
40 dance of rare species in tropical communities. In these communities, it is well-known  
41 that abundance distributions are typically characterized by long right tails with few  
42 abundant species and many rare ones (Hubbell, 2001; Stratford & Robinson, 2005).  
43 Such high proportion of rare species in the overall community makes it very difficult  
44 to obtain enough detections during field surveys for appropriate estimation of both  
45 abundance and detection probability for many, if not the majority of species. When  
46 we extensively tested via simulations these recent methodologies, we found persistent  
47 bias in estimates of low abundances that corresponded to abundance ranges previously  
48 not dealt with in temperate forest studies yet common in neotropical studies (see also  
49 Yamaura, 2013; Yamaura *et al.*, 2016). As an answer to this problem, here we present  
50 an alternative, community-based abundance estimation approach that markedly im-  
51 proves these estimates. Our method is widely applicable in communities marked by  
52 patterns of rare abundance (Stratford & Robinson, 2005; Robinson *et al.*, 2000) or  
53 other ecological systems characterized by rare events (*e.g.* Seabloom *et al.*, 2015).

54 In the single-species N-mixture, the model is used to estimate the abundance  
55 given imperfect detection (MacKenzie *et al.*, 2002; Martin *et al.*, 2005; Royle & Do-  
56 razio, 2008). It uses spatially and temporally replicated counts in which the counts  
57 of species  $y$  are binomially distributed with  $N$  being the total number of individuals  
58 available for detection and  $p$  the probability of detecting an individual of that species  
59 (Royle, 2004). The model is hierarchical because the abundance  $N$  is assumed to be a

60 latent (i.e., unobserved), random process adopting a discrete probability distribution  
61 (*e.g.*, Poisson). Inferences about the abundance of the species of interest therefore  
62 rely on estimating the detection probability and the underlying parameters of the  
63 distribution giving rise to  $N$  (Royle, 2004). Alternatively, multi-species models have  
64 been proposed to deal with estimating the abundance and occupancy of species with a  
65 limited amount of detections (see Iknayan *et al.*, 2014; Denes *et al.*, 2015, for reviews).  
66 These models have the advantage of “borrowing information” from abundant species  
67 in the community to estimate parameters of rare ones (Zipkin *et al.*, 2009; Ovaskainen  
68 & Soininen, 2011; Yamaura *et al.*, 2016, 2011; Chandler *et al.*, 2013; Barnagaud *et al.*,  
69 2014). Most of the research and advances in the proposition of multi-species models  
70 has focused on estimating occupancy (Iknayan *et al.*, 2014; Denes *et al.*, 2015), even  
71 though understanding the abundance and rarity of species is one of the main goals of  
72 ecology (Yamaura *et al.*, 2016; Hubbell, 2001; McGill *et al.*, 2007).

73         In recent multi-species abundance models, both abundance and detection prob-  
74 abilities are assumed to be normally distributed random effects at the logit or log  
75 scales governed by a community’s “hyper-parameters” (Iknayan *et al.*, 2014). For  
76 these reasons, they have been named community abundance models because they  
77 focus on describing the characteristics of the entire community from spatially and  
78 temporally replicated counts or detections (Yamaura *et al.*, 2011, 2012, 2016). The  
79 main assumption behind the community abundance models is that groups of species  
80 in the community might share characteristics that make their abundance and de-  
81 tection probability likely to be correlated (Yamaura *et al.*, 2011, 2012, 2016; Sauer  
82 & Link, 2002; Barnagaud *et al.*, 2014; Ruiz-Gutiérrez *et al.*, 2010). These types of  
83 abundance community models have been useful for estimating diversity properties of  
84 species assemblages while accounting for imperfect detection (Yamaura *et al.*, 2011,  
85 2012).

86         While the assumption of normally distributed logit-transformed random effects

87 for detection probabilities of species across the community is statistically convenient,  
88 other probability distributions might have properties more directly related. Martin  
89 *et al.* (2011), for example, proposed a single-species abundance estimation model that  
90 allowed individuals within a species to vary in detection probability. They assumed  
91 that detection probabilities in a species were described by a beta distribution that  
92 naturally ranges between [0-1]. The latter assumption is convenient for community  
93 abundance models as well, because it eliminates the need of the logit transforma-  
94 tion. Furthermore, Dorazio *et al.* (2013) showed that the beta distribution can be  
95 parametrized to reflect the mean detection probability among species and their de-  
96 gree of similarity making the two parameters that determine the shape of the beta  
97 distribution ecologically interpretable.

98 In this study, we: (1) increase the simulation scenarios presented in Yamaura  
99 (2013) to provide a full baseline for the sampling design for ecologists who want to  
100 estimate the abundance of tropical organisms (or any system with rare occurrence  
101 or detection difficulties) using N-mixture models, (2) propose an alternative multi-  
102 species abundance model that uses a beta distribution for the random effects of detec-  
103 tion probability instead of a normal distribution, (3) propose a maximum likelihood  
104 approach for multi-species abundance estimation using Data Cloning and (4) com-  
105 pare our alternative multi-species abundance model to one previously proposed. Our  
106 study focuses on scenarios in which species have already been detected but the number  
107 of detections per species are insufficient to estimate detection-corrected abundances  
108 (i.e., low-abundance species). Our study does not focus on estimating the number  
109 or identity of unseen species. Instead we point to alternative models developed to  
110 account for this type of uncertainty (*e.g.* Dorazio & Royle, 2005; Royle & Dorazio,  
111 2008; Tingley & Beissinger, 2013).

## 112 1.1 The Model

113 In the following section, after summarizing the widely used N-mixture models, we  
114 develop a multi-species model extension that allows a more accurate estimation of the  
115 abundance of rare species. Our approach differs from other multi-species abundance  
116 estimation by assuming that detection probabilities in a community are the product  
117 of a beta distribution instead of a logit transformation of normally distributed random  
118 effects.

119 According to an N-mixture model coded for one species, we let  $y_{ij}$  be the  
120 number of individuals for that species in the  $i^{\text{th}}$  spatially replicated sampling unit  
121 and  $j^{\text{th}}$  temporal replicate of the sampling unit. Let  $p$  be the individual detection  
122 probability for that species. Finally, let  $n_i$  be the fixed number of individuals available  
123 for detection in the  $i^{\text{th}}$  sampling unit. If we assume that the counts are binomially  
124 distributed, the likelihood of the counts  $(y_{ij})$  for a given species is

$$\mathcal{L}(n_i, p) = \prod_{i=1}^r \prod_{j=i}^t \binom{n_i}{y_{ij}} p^{y_{ij}} (1-p)^{n_i - y_{ij}}.$$

125 for  $i = 1, 2, 3 \dots r$  and  $j = 1, 2, 3 \dots t$ , where  $r$  is the total number of spatial replicates  
126 sampled and  $t$  is the number of times each spatial replicate was visited (Royle, 2004).  
127 In bird studies, for example, a common method used to survey individual populations  
128 or communities is fixed-radius plots (Hutto *et al.*, 1986; Bibby *et al.*, 2000). In this  
129 case, the researcher randomly locates 50-meter radius spatially replicated plots across  
130 the study area that are visited at different times. From here on, we will make our  
131 assumptions and definitions around this scenario in which 50-meter plots refer to  
132 spatial replicates of the sampling area and visits refers to temporal replicates of the  
133 count process in each plot. Also, in accord with conventions from bird literature, we  
134 will name each 50-m radius plot as a point count.

135 The N-mixture model assumes that the number of individuals available for

136 detection in a point count is in fact unknown and random. Thus, this number is  
 137 considered to be a latent variable, modeled with a Poisson process with mean  $\lambda$ . In  
 138 what follows,  $\lambda$  is defined as the mean number of individuals per unit area, and we  
 139 will refer to it as the “density”. We will write  $N_i \sim \text{Pois}(\lambda)$ , where we have used the  
 140 convention that lowercase letters such as  $n_i$  denote a particular realization of the (cap-  
 141 italized) random variable  $N_i$ . We note in passing that matrices will also be denoted  
 142 with a capital letter, but will be written in bold. To compute the likelihood function,  
 143 one then has to integrate the binomial likelihood over all the possible realizations of  
 144 the Poisson process,

$$\mathcal{L}(\lambda, \underline{p}) = \prod_{i=1}^r \sum_{n_i=\max(\underline{y}_i)}^{\infty} \prod_{j=1}^t \binom{n_i}{y_{ij}} p^{y_{ij}} (1-p)^{n_i-y_{ij}} \frac{e^{-\lambda} \lambda^{n_i}}{n_i!}, \quad (1)$$

145 where  $\underline{y}_i$  is a vector of length  $r$  with the observed counts for that species for  $i^{\text{th}}$  point  
 146 count. If the objective is to estimate the abundance of  $S$  species, the overall likelihood  
 147 is simply written as the product of all the individual species’ likelihoods, *i.e.*,

$$\mathcal{L}(\underline{\lambda}, \underline{p}) = \prod_{s=1}^S \prod_{i=1}^r \sum_{n_{si}=\max(\underline{y}_{si})}^{\infty} \prod_{j=1}^t \binom{n_{si}}{y_{sij}} p_s^{y_{sij}} (1-p_s)^{n_{si}-y_{sij}} \frac{e^{-\lambda_s} \lambda_s^{n_{si}}}{n_{si}!}, \quad (2)$$

148 where  $\underline{y}_{si}$  is a vector of length  $r$  with the observed counts for species  $s$  in the  $i^{\text{th}}$   
 149 point count, and both  $\underline{\lambda} = \{\lambda_1, \dots, \lambda_S\}$  and  $\underline{p} = \{p_1, \dots, p_S\}$  are vectors of length  
 150  $S$ . To avoid the proliferation of parameters one could assume that all the  $p_s$ ,  $s =$   
 151  $1, \dots, S$  come from a single probability model that describes the community-wide  
 152 distribution of detection probabilities (Yamaura *et al.*, 2011, 2012, 2016; Sauer & Link,  
 153 2002; Barnagaud *et al.*, 2014; Ruiz-Gutiérrez *et al.*, 2010). In this case, each species’  
 154 detection probability can be modeled with a beta distribution. Let  $P_1, P_2, \dots, P_S \sim$   
 155  $\text{Beta}(\alpha, \beta)$ . The probability density function of the random detection probabilities is

156 then  $g(p_s; \alpha, \beta) = \frac{\Gamma(\alpha+\beta)}{\Gamma(\alpha)\Gamma(\beta)} p_s^{\alpha-1} (1-p_s)^{\beta-1}$ .

157 Following Dorazio *et al.* (2013), we parameterize the Beta distribution as  
 158  $Beta(\alpha = \tau\bar{p}, \beta = \tau(1-\bar{p}))$  such that the parameters are related to biological pro-  
 159 cesses. Here,  $\bar{p}$  is the mean detection probability among species in the community  
 160 and  $\tau$  is a measurement of the similarity in detection probabilities (precision param-  
 161 eter; Dorazio *et al.*, 2013). Note that  $\bar{p}$  is equivalent to  $\mu$  in Dorazio *et al.* (2013)  
 162 parametrization but we avoid the use of  $\mu$  in this proposition to avoid confusions with  
 163 alternative models presented below. In this parametrization, the expected value and  
 164 variance of  $P$  are given by  $E[P] = \bar{p}$ ;  $\text{Var}[P] = \frac{\bar{p}(1-\bar{p})}{\tau+1}$ .

165 The overall likelihood function now integrates over all the realizations of the  
 166 community-wide detection probabilities  $P_s$ :

$$\begin{aligned} \mathcal{L}(\underline{\lambda}, \alpha, \beta) = & \int_0^1 \prod_{s=1}^S \prod_{i=1}^r \sum_{n_{si}=\max(\underline{y}_{\cdot si})}^{\infty} \prod_{j=1}^t \binom{n_{si}}{y_{sij}} p_s^{y_{sij}} (1-p_s)^{n_{si}-y_{sij}} \frac{e^{-\lambda_s} \lambda_s^{n_{si}}}{n_{si}!} \\ & \times \frac{\Gamma(\alpha+\beta)}{\Gamma(\alpha)\Gamma(\beta)} p_s^{\alpha-1} (1-p_s)^{\beta-1} dp_s. \end{aligned} \tag{3}$$

167 The usefulness of specifying the likelihood in this way is that in the case in which many  
 168 species are rare, we can use the information on the abundant species to estimate the  
 169 detection probability, leaving the actual counts to estimate only the abundance of the  
 170 species. Note that by integrating the beta process at the outmost layer of the model,  
 171 we are following the sampling structure. When this approach is used and the integral  
 172 is tractable, the resulting distribution is a multivariate distribution with a specific  
 173 covariance structure (Sibuya *et al.*, 1964). Thus, we expect our approach to result  
 174 in a multivariate distribution of counts with a covariance structure arising naturally



175 from the sampling design and the assumed underlying beta process of detectabilities  
176 (see Table 1 for further description of the Beta N-mixture model).

## 177 **1.2 Maximum Likelihood Estimation**

178 One drawback of the beta-N-mixture, and other models for multi-species abundance  
179 estimation, is their computational complexity, which imposes a substantial numeri-  
180 cal challenge for Maximum Likelihood (ML) estimation. This problem is not unique  
181 to abundance estimation as it occurs in many other hierarchical models in ecology  
182 (Lele & Dennis, 2009). For these reasons, parameter estimation in hierarchical mod-  
183 els is usually performed under a Bayesian framework (Cressie *et al.*, 2009). To date,  
184 however, many numerical approximations for obtaining the Maximum Likelihood Es-  
185 timates (MLEs) for hierarchical models have been proposed (de Valpine, 2012). The  
186 “Data Cloning” (DC) methodology has proven to be a reliable approach to obtaining  
187 MLEs, testing hypotheses, model selection, and unequivocally measuring the estima-  
188 bility of parameters for hierarchical models (Lele *et al.*, 2010; Ponciano *et al.*, 2012).  
189 The method proposed by Lele *et al.* (2007, 2010) uses the Bayesian computational  
190 approach coupled with Monte Carlo Markov Chain (MCMC) to compute MLEs of  
191 parameters of hierarchical models and their asymptotic variance estimates (Lele *et al.*,  
192 2007). The DC protocol is advantageous as one only needs to compute means and  
193 variances of certain posterior distributions.

194 Data Cloning proceeds by performing a typical Bayesian analysis on a dataset  
195 that consists of  $k$  copies of the originally observed data set. In other words, to  
196 implement this method, one has to write the likelihood function of the data as if one  
197 had observed  $k$  identical copies of the data set. Then, Lele *et al.* (2007, 2010) showed  
198 that as  $k$  grows large, the mean of the resulting posterior distribution converges on  
199 the MLE. In addition, for continuous parameters such as  $\underline{\lambda}$ ,  $\bar{p}$ , and  $\tau$ , the variance  
200 covariance matrix of the posterior distribution converges to  $\frac{1}{k}$  times the inverse of the

201 observed Fisher’s information matrix. Thus, the variance estimated by the posterior  
202 distribution can be used to calculate Wald-type confidence intervals of the parameters  
203 (Lele *et al.*, 2007, 2010). The advantage of DC over traditional Bayesian algorithms is  
204 that while in Bayesian algorithms the prior distribution might have influence over the  
205 posterior distribution, in DC the choice of the prior distribution does not determine  
206 the resulting estimates. In our case, the hierarchical statistical model for every species  
207  $s$  in  $s = 1, 2, \dots, S$  is

$Y_{sij} \sim \text{Binomial}(N_{si}, P_s)$  with pmf  $f(y_{sij} | N_{si} = n_{si}, P_s = p_s)$  (Observation model),

$N_{si} \sim \text{Pois}(\lambda_s)$  with pmf  $g(n_{si}; \lambda_s)$ , (Process model for the abundance),

$P_s \sim \text{Beta}(\bar{p}\tau, (1 - \bar{p})\tau)$  with pdf  $h(p_s; \bar{p}, \tau)$  (Process model for the detection probability),

208 where  $s = 1, 2, \dots, S$ ,  $i = 1, 2, \dots, r$  and  $j = 1, 2, \dots, t$  and pmf and pdf correspond to  
209 the probability mass function and probability density functions respectively. Accord-  
210 ing to our model, the values of  $\lambda_1, \lambda_2, \dots, \lambda_S$  are parameters to be estimated. MLE  
211 of our model parameters would then generate point estimates of these parameters. In  
212 a Bayesian framework, however, parameters are random variables. Accordingly, the  
213 values of  $\underline{\lambda}$ ,  $\bar{p}$  and  $\tau$  would be modeled as random variables themselves that have a  
214 posterior distribution  $\pi(\underline{\lambda}, \bar{p}, \tau | \mathbf{Y}_1, \mathbf{Y}_2, \dots, \mathbf{Y}_S)$ . The Bayesian point estimates would  
215 typically be taken to be the posterior means or modes (although in a pure Bayesian  
216 approach the object of inference is the entire posterior distribution). We mention  
217 this Bayesian approach because, as we describe above, the DC methodology “tricks”  
218 a Bayesian estimation setting into yielding the MLEs. For this model, the specifica-  
219 tion of the Bayesian approach would require sampling from the following posterior  
220 distribution:

$$\pi(\underline{\lambda}, \bar{p}, \tau, N_{11}, N_{12}, \dots, N_{Sr}, P_1, P_2, \dots, P_S | \mathbf{Y}_1, \mathbf{Y}_2, \dots, \mathbf{Y}_S) \propto \left[ \prod_{s=1}^S \prod_{i=1}^r \prod_{j=1}^t f(y_{sij} | N_{si} = n_{si}, P_s = p_s) g(n_{si}; \lambda_s) h(p_s; \bar{p}, \tau) \right] \pi(\underline{\lambda}, \bar{p}, \tau),$$

221 where  $\pi(\underline{\lambda}, \bar{p}, \tau)$  is the joint prior of the model parameters. Samples from an MCMC  
 222 of this posterior distribution would yield many samples of the parameters

$$\underline{\lambda}, \bar{p}, \tau, N_{11}, N_{12}, \dots, N_{Sr}, P_1, P_2, \dots, P_S.$$

223 In order to sample from the marginal posterior  $\pi(\underline{\lambda}, \bar{p}, \tau | \mathbf{Y}_1, \mathbf{Y}_2, \dots, \mathbf{Y}_S)$  one only  
 224 needs to look at the samples of the subset of  $\underline{\lambda}$ ,  $\bar{p}$ , and,  $\tau$ . The DC approach proceeds  
 225 similarly, except one needs to sample from the following posterior distribution:

$$\pi(\underline{\lambda}, \bar{p}, \tau, N_{11}, N_{12}, \dots, N_{Sr}, P_1, P_2, \dots, P_S | \mathbf{Y}_1, \mathbf{Y}_2, \dots, \mathbf{Y}_S)^{(k)} \propto \left[ \prod_{s=1}^S \prod_{i=1}^r \prod_{j=1}^t f(y_{sij} | N_{si} = n_{si}, P_s = p_s) g(n_{si}; \lambda_s) h(p_s; \bar{p}, \tau) \right]^k \pi(\underline{\lambda}, \bar{p}, \tau),$$

226 The notation  $^{(k)}$  on the left side of this equation does not denote an exponent but the  
 227 number of times the data set was “cloned”. On the right hand side, however,  $k$  is an  
 228 exponent of the likelihood function based on the original data (*i.e.* un-cloned data;  
 229  $\mathcal{L}(y^{(k)}) = \mathcal{L}(y)^k$ ). The MLEs of  $\underline{\lambda}$ ,  $\bar{p}$ , and,  $\tau$  are then simply obtained as the empirical  
 230 average of the posterior distribution  $\pi(\underline{\lambda}, \bar{p}, \tau | \mathbf{Y}_1, \mathbf{Y}_2, \dots, \mathbf{Y}_S)^{(k)}$  and the variance of  
 231 the estimates are given by  $\frac{1}{k}$  times the variance of this posterior distribution.

## 2 Methods

### 2.1 Estimation for Single Species

To determine the minimum sample size required for accurate estimation of the abundance of tropical species, we used a series of simulations in which we varied the number of point counts ( $r$ ), visits to point counts ( $t$ ; 50 meter fixed radius), density (mean number of individuals) in a 100 ha plot ( $\lambda$ ), and detection probability ( $p$ ). Point counts were assumed to be randomly located in a 100-ha plot. We varied  $r$  between 5 and 50,  $t$  between 2 and 20,  $\lambda = 1, 2, 3, 4, 5, 7, 10, 15, 25, 40, 55, 65, 75, 85, 100$  and  $p$  between 0.1 and 0.9. Even though we assumed that  $\lambda$  was at a scale of individuals/100ha, because of the sampling area and design, the actual estimates are in individuals/0.78-ha. Thus, in this section and throughout out the rest of the sections, we estimated  $\lambda = \text{individuals}/0.78 - \text{ha}$  and extrapolate the estimates by applying  $\lambda_{100-\text{ha}} = \frac{100 * \lambda_{0.78-\text{ha}}}{0.78}$ . For the latter,  $\lambda_{100-\text{ha}}$  represents the density of an individual species  $s$  in a 100-ha plot and  $\lambda_{0.78-\text{ha}}$  represents the density of a species in a point count with area of 0.78 ha. The area of the point counts corresponds with the area of a 50-m radius circular plot calculated as  $\pi * 50^2 = 7854 \text{ m}^2 \approx 0.78 \text{ ha}$ . For each combination of parameters, we simulated 170 data sets and estimated  $\lambda_{0.78-\text{ha}}$  and  $p$  using equation 1. In each simulation, we computed the relative bias of the abundance estimate by using,  $\text{bias} = \frac{\hat{\lambda} - \lambda}{\lambda}$ , where  $\hat{\lambda}$  is the MLE for a particular data set and  $\lambda$  is the true value of the parameter. Finally, we retained the mean bias for each combination of model parameters. We considered an acceptable bias to be lower than 0.1, which is a 10% difference between the estimate and the true population density. All of the simulations were performed using R statistical software v.3.0.2 (R Core Team, 2013) and MLE by maximizing the likelihood of eq (1) using the optim function with the Nelder-Mead algorithm. The R code used for simulations and maximum likelihood estimation is presented in the Appendix B.

## 258 **2.2 Assessing the Beta N-mixture Model performance**

259 To assess the Beta N-mixture Model performance we followed three steps: (1) bias  
260 benchmark assessment, (2) comparisons with other community abundance models  
261 and (3) examples using real data. For bias benchmark assessment (section 2.2.1) we  
262 simulated 1500 data sets under the Beta N-mixture model, computed the MLEs of  
263 our model parameters each time, and then examined the distribution of the MLEs.  
264 The objective of this approach was to determine if the average of the distribution  
265 of MLEs approaches the true parameter values and if the variability around those  
266 estimates is small. In reality, data come from a much more complex process involving  
267 many variables and quantities. Therefore, in the comparison with other community  
268 abundance models (section 2.2.2), we tested the robustness of our model by simulating  
269 data from a complex, spatially explicit data-generating process, which is different from  
270 the Beta N-mixture model. For this comparison, we simulated 500 datasets and then  
271 estimated the density and detection probabilities using our model. We compared the  
272 performance of our model *vis-à-vis* a previously proposed multi-species abundance  
273 model (Yamaura *et al.*, 2016). From here on, we refer to Yamaura *et al.* (2016)'s  
274 approach as the Normal N-mixture model. Finally, in the example using real data  
275 (section 2.2.3) we estimated the density of 26 species of neotropical dry forest birds  
276 using a previously unpublished dataset. The objective of this step was to illustrate the  
277 use of our model with a realistic scenario and compare the outcome of the estimates  
278 with the Normal N-mixture model.

### 279 **2.2.1 Bias benchmark assessment**

280 To evaluate the bias of the Beta N-mixture model, we simulated species counts ( $Y_s$ )  
281 in a 100-ha plot sampled using 25, point counts visited three times each. We as-  
282 sumed that the community was composed of 15 species, each one with a different  
283 density varying between 1 and 100 individuals/100ha ( $\lambda_{100-ha} = 1, 2, 3, 4, 5, 7, 10, 15,$

284 25, 40, 55, 65, 75, 85, 100). In the latter vector each value of  $\lambda_{100-ha}$  represents the den-  
285 sity of a single species in the 100-ha plot. In each simulation we drew  $N_{sij}$  individuals  
286 in each point count from a Poisson distribution with mean  $\lambda_{(0.78-ha)s} = \frac{\lambda_{(100-ha)s} * 0.78}{100}$ .  
287 Note that even though  $N_{sij}$  are the realized number of individuals from the Poisson  
288 distribution with mean  $\lambda_{(0.78-ha)s}$ , these quantities are unobserved because the counts  
289  $y_{sij}$  depend on the detection process. For this simulation, as in the general specifi-  
290 cation of the model, sub-index  $i$  refers to the spatial replication ( $i = 1, 2, 3, \dots, r$ ),  
291 sub-index  $j$  refers to the temporal replication of the counts ( $j = 1, 2, 3, \dots, t$ ) and  
292 the sub-index  $s$  refers to the species for which abundance is being modeled ( $s =$   
293  $1, 2, 3, \dots, S$ ; see section 1.1 for definitions). We then simulated the detection process  
294 using a binomial distribution with parameters  $N_{sij}$  and  $p_s$ . We varied mean detec-  
295 tion probability by assuming  $\bar{p} = 0.25, 0.5, 0.75$  and  $\tau = 4.5$  ( $E[P] = 0.25, 0.5, 0.75$ ;  
296  $\text{Var}[P] = 0.03, 0.04, 0.03$ ). Even though the variance seems small, the 2.5% and  
297 97.5% quantiles of the three distributions range over a large portion of the  $[0,1]$  inter-  
298 val (quantiles 2.5 and 97.5: low = (0.01,0.68); mid = (0.1,0.89); high = (0.31,0.98)).  
299 For each type of community we simulated 500 data sets, and estimated  $\lambda_s$ ,  $\bar{p}$  and  $\tau$   
300 using DC. To determine the number of clones required for accurate estimation of the  
301 MLEs of  $\lambda_s$ ,  $\bar{p}$  and  $\tau$  we used one randomly generated data set and estimated the  
302 parameters cloning the data sequentially from 1 to 64 times (Lele *et al.*, 2010). This  
303 procedure allowed us to determine an adequate number of clones to get convergence  
304 of the  $k^{\text{th}}$  posterior mean to the MLEs. We used rjags v. 4.2.0 (Plummer, 2014) with  
305 two Markov chains allowing each chain to run for 20000 generations sampling every  
306 20 generations and discarded the first 1000 iterations. For each type of community  
307 and each simulation we estimated the relative bias ( $\text{bias} = \frac{(\text{Estimated}-\text{True})}{\text{True}}$ ) in  $\lambda_s$ ,  $\bar{p}$   
308 and  $\tau$ .

### 309 2.2.2 Comparison to other community abundance models

310 There are two essential differences between the Beta and Normal N-mixture models.  
311 First, Beta models treat density ( $\lambda$ , the mean number of individuals per sampling  
312 unit) as a fixed effect instead of random. As a result, the Normal N-mixture model  
313 has an extra hierarchy level than our model (Table 1). Both are hierarchical stochastic  
314 models where the binomial sampling model is the first hierarchy level in which the  
315 realized, but unobserved, abundances (the  $N$ 's) and the detection probabilities are  
316 the inner hierarchies. In both models,  $N \sim Poisson(\lambda)$ . The Normal N-mixture  
317 model includes an additional level and assumes that the parameters  $\lambda$  governing the  
318 realized abundances  $N$  also come from a stochastic process governed itself by hyper-  
319 parameters. In the Beta model however,  $\lambda$  does not have any hierarchy and one  $\lambda$  for  
320 each species is estimated. The second difference between our model and the Normal N-  
321 mixture model is the distributional assumption giving rise to detection probabilities.  
322 In our model  $p_s$  are assumed to be  $P \sim Beta(\tau\bar{p}, \tau(1 - \bar{p}))$  and in the Normal model,  
323  $p_s = \frac{1}{1+e^{-(r_s)}}$  where  $R \sim \mathcal{N}(\mu, \sigma^2)$ , which gives a Johnson's SB distribution between  
324 0 and 1. Besides these two model differences, Yamaura *et al.* (2016) used a Bayesian  
325 approach to fit their hierarchical model, whereas we used the MLE method. Much  
326 discussion exists regarding the merits of each inferential approach for hierarchical  
327 models in Ecology (see for instance Lele & Dennis, 2009; Cressie *et al.*, 2009). Here  
328 we limit ourselves to comparing the results from Yamaura *et al.* (2016)'s estimation  
329 approach, which is widely used as the benchmark of a known method in the literature,  
330 to our approach. Table 1 presents a comparison of the statistical models' structures.

331 To compare the performance of the Normal and Beta N-mixture models we  
332 simulated 500 data sets under a spatially explicit model that had a different structure  
333 from the models evaluated (Table 1). For each data set we fitted the Normal and  
334 Beta N-mixture models and compared the posterior mean and mode estimates of  
335 the Normal N-mixture with the MLEs of the Beta N-mixture model (see Figure

2). For each simulation, we randomly drew 30  $\lambda_{(100-ha)s}$  from a gamma distribution with parameters  $\alpha = 0.65$ ,  $\beta = 0.033$  and excluded  $\lambda_{s(100-ha)}$  values smaller than 1 individuals/100 ha, resulting in a community of 27 species. The gamma distribution used is the best fit of an observed species abundance distribution of a neotropical bird assemblage that was gathered using field-intensive methods (Robinson *et al.*, 2000). We then randomly drew from a Poisson distribution with mean  $\lambda_{(100-ha)s}$ , the number of individuals of the  $s^{\text{th}}$  species ( $N_s$ ) present in the 100-ha plot. We located each individual randomly across the plot and then randomly placed 25 point counts in the 100-ha plot that were separated by at least 150 meters. Finally, we obtained species-specific detection probability ( $p_s$ ) from a uniform distribution between 0 and 1. To obtain the counts  $y_{sij}$ , we drew the number of individuals detected in a point count from a binomial distribution using the number of individuals in point counts  $n_{sij}$  and the individual's detection probability  $p_s$ . We repeated the detection process three times to generate three temporal replicates of the sampling process. The R-function to simulate the described process is presented in Appendix B.

For each of the simulated data sets we estimated  $\lambda_{(0.78-ha)s}$ ,  $\bar{p}$  and  $\tau$  under the Beta N-mixture model using ML estimation with DC (Lele *et al.*, 2007). We used the variance-covariance matrix of the posterior distribution of  $\lambda_{(0.78-ha)s}$ ,  $\bar{p}$  and  $\tau$  to estimate Wald-type confidence intervals for each parameter (Lele *et al.*, 2007, 2010). Models were built and analyzed using rjags (Plummer, 2014) with 2 chains, with 20,000 iterations in each chain and retained the parameter values every 20 generations after a burn-in period of 1000 generations. After initial parameter estimation, we sampled the posterior distribution given the estimated parameters to obtain the realized values of  $p_s$  given the data. For the Normal N-mixture model we performed Bayesian parameter estimation using rjags and ran the analysis using 2 chains, with 50,000 iterations and retained parameters values every 20 generations after a burn-in of 10,000 generations. Even though the Normal N-mixture model is fully specified



363 by the mean and variance of the abundance and detection processes (see Yamaura  
364 *et al.*, 2016), the Beta N-mixture model has no stochastic hierarchy over  $\lambda$ ; thus, for  
365 comparisons of the two models we retained the mean and mode of  $\lambda_{(0.78-ha)s}$ . Because  
366  $p_s$  is also a random variable with an additional level of hierarchy in the Normal N-  
367 mixture model, we also retained the mean and mode of the posterior distribution of  
368  $p_s$  resulting from Bayesian estimation. Once we obtained the estimates of  $\lambda_{(0.78-ha)s}$ ,  
369 we extrapolated this estimate to  $\lambda_{(100-ha)s}$  as described in sections 2.1 and 2.2.1.

### 370 **2.2.3 Example Using Real Data**

371 Finally, we used a data set that consisted of 94 point counts located in three dry  
372 forest patches in Colombia. Each point count was replicated three times from Jan-  
373 uary 2013 to July 2014. From this data set, we selected the understory insectivore  
374 species that forage in foliage (Karr *et al.*, 1990; Parker III *et al.*, 1996) to meet the  
375 requirement of the Beta N-mixture model of correlated detection probabilities among  
376 species. In total, we estimated the abundance of 26 species using both the Beta and  
377 Normal N-mixture models. We are aware that it is likely that the closed population  
378 assumption for this data set might not hold, but it is unlikely that populations of  
379 species have changed drastically from one year to another during these years. The  
380 point counts were performed in three different forest patches in the upper Magdalena  
381 Valley of Central Colombia. To maximize the sample size for abundance estima-  
382 tion, we aggregated the point counts into a single data set, such that the inferences of  
383 species abundances are made for the entire region instead of the particular patch. The  
384 three forest patches were separated by less than 150 km and were located within the  
385 Magdalena Valley dry forest region. Because they are in the same habitat type, the  
386 structural variables of the forest are similar and thus it is unlikely that the detection  
387 probabilities vary among patches as well as the abundance of species, allowing us to  
388 aggregate the data. Bayesian and ML estimation for the Normal and Beta N-mixture

389 models, respectively, were performed in the same way as described previously. In  
390 order to evaluate the effect of the prior distributions on the estimates of the Nor-  
391 mal N-mixture model, we also estimated the parameters of the Normal N-mixture  
392 using ML estimation through DC. Taking advantage of the ML estimation of the  
393 Normal and Beta N-mixture model, we further performed model selection following  
394 Ponciano *et al.* (2009)'s procedure to compute the difference in Akaike's Information  
395 Criterion ( $\Delta\text{AIC}$ ) between the two models. For model selection we assumed the null  
396 model to be the Beta N-mixture model and the alternative the Normal N-mixture.  
397  $\Delta\text{AIC} = -2\ln\left(\frac{\hat{\mathcal{L}}_0}{\hat{\mathcal{L}}_a}\right) + 2(d_0 - d_a)$ , where  $\hat{\mathcal{L}}_0$ ,  $\hat{\mathcal{L}}_a$  are the maximized likelihoods and  
398  $d_0$ ,  $d_a$  are the number of parameters of the Beta and Normal N-mixture models re-  
399 spectively model. Note that a  $\Delta\text{AIC} < -2$  would provide strong evidence in favor  
400 of the Beta N-mixture model, in contrast a  $\Delta\text{AIC} > 2$  would provide support in  
401 favor of the Normal N-mixture model. R code and jags models used are presented in  
402 Appendix B

## 403 **3 Results**

### 404 **3.1 Estimation for Single Species**

405 We found that the required minimum sample size needed for accurate estimation of  
406 the density of tropical organisms decreased when both  $\lambda$  and  $p$  (Figure 1) were in-  
407 creased. For the sample sizes evaluated, there was no combination of point counts and  
408 replicates that allowed the estimation of densities with less than 7 individuals/100ha  
409 using single-species N-mixture models (Figure A1). In the 7 ind/100ha threshold, the  
410 effort required is very high. For example, for species with a probability of detection  
411 of 0.5 the required sample size to obtain a bias lower than 0.1 is around 50 points  
412 and more than 6 replicates of each point count or around 40 point counts with more  
413 than 10 replicates (Figure 1,A1). As  $\lambda$  increases the sample size required to estimate

414 appropriately the density of species decreases.

## 415 **3.2 Assessing the Beta N-mixture Model performance**

### 416 **3.2.1 Bias Benchmark assessment**

417 We found that the parameters of the Beta N-mixture model were fully identifiable  
418 because the relative magnitude of the first eigenvalue of the parameter variance-  
419 covariance matrix decreased very similarly at a rate of  $1/k$  (*eigenvalue* =  $-0.07 +$   
420  $1.02(1/k)$ ;  $r^2 = 0.98$ ). This result also identified that 20 clones were enough to  
421 guarantee convergence to the MLEs. The Beta model tended to slightly overestimate  
422 the density of rare species and underestimate the density of abundant species but this  
423 tendency decreased with increasing detection probability (Figure A2), as suggested  
424 by the slopes estimated by the relationship between estimated and true  $\lambda$ . The  
425 relationship for  $p = 0.25$  was  $\hat{\lambda} = 5.8 + 0.7\lambda$ , for  $p = 0.5$  was  $\hat{\lambda} = 4 + 0.9\lambda$  and for  
426  $p = 0.75$  was  $\hat{\lambda} = 3.3 + 0.95\lambda$ . The bias decreased (approximately) as a function of  
427 the true value of  $\lambda$  according to the equation  $\text{bias}(\lambda) = -0.45(\frac{1}{\lambda} + 7.5)$  for  $p = 0.25$ ,  
428 and  $\text{bias}(\lambda) = -0.26(\frac{1}{\lambda} + 5.6)$  for  $p = 0.5$  and  $\text{bias}(\lambda) = -0.2(\frac{1}{\lambda} + 5)$  for  $p = 0.75$ .

429 Assuming that a 10% bias in the estimation is acceptable, the minimum  $\lambda$  that  
430 the model is able to estimate is 13 - 17 individuals/100 ha regardless of the detection  
431 probability. It is noteworthy, however, that a bias of 100% in the low-abundance end  
432 has little effects on the ecological interpretation of the estimates. Thus, if one sets  
433 bias in the abundance estimates to 100% (left hand side in the bias functions above),  
434 the model is able to predict the density of species with 3 - 5 individuals/100 ha.

435 The beta N-mixture model also performs well in estimating the distribution  
436 of the community's detection probability (Figure A3). The distribution of  $\bar{p}$  for the  
437 simulations is almost centered in the true value of  $p$ . There is a slight overestimation  
438 of  $\bar{p}$  when  $p = 0.25$  (Figure A3). The model tends to underestimate  $\widehat{\text{Var}}[P]$ , but  
439 estimates it to be similar across the different types of simulations (Figure A3).

### 440 3.2.2 Comparison to other community abundance models

441 The beta N-mixture model performed better than the Normal model in estimating the  
442 abundance and detection probability of rare species. Whereas the posterior means and  
443 modes of the Normal model were biased towards species with abundances lower than  
444 4 individuals/100 ha, MLEs of the Beta model were not (Figure 3). Furthermore, we  
445 found that the posterior means tended to be more biased than the posterior mode in  
446 estimating  $\lambda$  (Figure 3). The opposite seems to be true for the detection probabilities  
447  $p$ . Both the posterior mode and mean underestimated  $p$  for rare species (Figure 4).

### 448 3.3 Example Using Real Data

449 We present the estimates of  $\hat{\lambda}$  for both models in Table 2. The resulting estimates of  
450 the densities were very similar for both Beta and Normal N-mixture models (Table 2,  
451 Figure A4, Figure A5). The confidence intervals of the Beta N-mixture and Normal  
452 N-mixture overlapped for every species (Table 2). The differences in the estimates are  
453 slightly higher for rare species when estimated using the Normal N-mixture model.  
454 The Beta model estimated  $\bar{p} = 0.26(0.2, 0.3)$  and  $\tau = 13.5(11.9, 15)$ . The normal  
455 model estimated  $\mu = -1.22(-1.5, -1)$  and  $\sigma^2 = 0.2(0.01, 0.6)$  or a mean detection  
456 probability of  $\hat{p} = 0.23(0.18, 0.27)$  (Figure A5). The estimates of  $\lambda$  from the Normal  
457 N-mixture model obtained by Bayesian estimation were indistinguishable from the  
458 ones obtained from MLE (Figure A4). We found  $\Delta\text{AIC} = -328.6$  suggesting that  
459 the Beta N-mixture model is a much better fit for the counts of birds in the dry forest  
460 of the Magdalena Valley than the Normal N-mixture model.

## 461 4 Discussion

462 Our results involve three major findings. First, single species N-mixture models  
463 require a high number of spatial and temporal replicates for accurate estimation of

464 the abundance of tropical organisms (Figure 1, see also Yamaura, 2013). Second,  
465 we found that the MLEs of a wide range of abundances computed using the Beta  
466 N-mixture model have good statistical properties. Among these is a low relative bias  
467 of the parameters ( $p$  and  $\lambda$ ); our approach led to unbiased estimates of the density of  
468 rare species with 1-3 individuals/100 ha (Figure 3, Figure A2). And third, we show  
469 that the MLEs of the Beta N-mixture model parameters have lower biases than the  
470 estimates provided by Yamaura *et al.* (2016)'s Normal N-mixture model (Figures 3,4)  
471 and that in real scenarios the Beta N-mixture model fits the data better.

472 N-mixture models have been proven to be useful in scenarios where species are  
473 abundant (*e.g.* Royle, 2004; Joseph *et al.*, 2009). If the objective were to estimate the  
474 abundance of a single species, our simulations provide a guide to the sampling effort  
475 required. Published databases (*e.g.* Parker III *et al.*, 1996; Karr *et al.*, 1990) include  
476 estimates of abundance of many neotropical species, which could provide general  
477 guidelines to researchers in the field about the approximate  $\lambda$  and the approximate  
478 sample sizes needed to correctly estimate abundance using N-mixture models.

479 For rare species, the solution is to use the community abundance models. Our  
480 study and Yamaura *et al.* (2016) provide two examples of how to apply the estimation  
481 of the abundance to a set of species. Our approach has the additional advantage of  
482 providing estimates with low bias even for species with low density and low detection  
483 probabilities. For example, for communities with  $\bar{p} = 0.25$ , the mean bias for species  
484 with one individual/100 ha is around 700% (Figure A2). This number sounds extreme  
485 but it only increases the abundance from one to seven individuals/100ha having little  
486 effect on the ecological inferences drawn from the model. Furthermore, estimating the  
487 parameters of the Beta N-mixture model using a larger set of species in the community  
488 apparently corrects this bias. Our simulation under a more complex model shows that  
489 the Beta N-mixture model has almost no bias in estimating the density of species  
490 close to 1 individual/100 ha (Figure 3). The bias correction demonstrates that the

491 larger the community, the less biased the estimates are likely to be. The latter is  
492 particularly convenient for tropical communities that are likely to have high species  
493 richness increasing the amount of information available to estimate the parameters  
494 for the entire community.

495 In comparison with other community abundance models (*i.e.* Yamaura *et al.*,  
496 2016), the Beta N-mixture model has lower bias in both  $\hat{\lambda}$  and  $\bar{p}$ . It is unknown how-  
497 ever, why the bias toward rare species arises, because an exponential transformation  
498 of a normal distribution predicts a high number of rare species. The same scenario  
499 arises with  $\bar{p}$  because the logit transformation of the normal distribution is more flex-  
500 ible than the beta distribution (Hafley & Schreuder, 1977). One explanation is that  
501 the extra level of hierarchy required by performing the transformations of the normal  
502 distribution influences estimates. Another possibility is that the prior distribution se-  
503 lected to perform the Bayesian estimation affects the location of the posterior means  
504 and modes. Our results, however, point to the former explanation rather than the  
505 latter, because the mean and mode of the Bayesian posterior distributions of  $\hat{\lambda}_s$  were  
506 indistinguishable from the MLEs in the real data set (Figure A4). Although in this  
507 case, prior distributions of parameters do not seem to affect the estimates, in general,  
508 prior elicitation in Bayesian analysis of hierarchical models is difficult (Lele & Den-  
509 nis, 2009). In a Bayesian analysis of hierarchical models, it is important to validate  
510 the inference of these computer-intensive techniques through simulations to test the  
511 properties of posterior distributions (Dorazio, 2016; Taper & Ponciano, 2016).

512 One little-explored issue in the estimation of abundances using complex hier-  
513 archical models fitted *via* a Bayesian approach, is assessing when prior distributions  
514 affect the estimates of model parameters. Different uninformative priors can produce  
515 different posterior distributions that alter the inferences drawn from the model (Lele  
516 & Dennis, 2009). In particular, the use of different priors in the estimation of the  
517 probability of the detection parameter in a binomial distribution has been shown to

518 have strong effects on the posterior distribution (Tuyl *et al.*, 2008). The latter is of  
519 particular interest for community abundance estimation because the counts used to  
520 estimate abundance in community models are assumed to be binomially distributed.  
521 Strong effects from the priors might not occur in cases where the data are so extensive  
522 that the information contained in the samples overshadows the information provided  
523 by the priors. Without extensive simulations, however, it is difficult to know if this  
524 is the case. Maximum Likelihood estimation *via* DC (Lele *et al.*, 2010) can be started  
525 with any prior distribution for the model parameters (as long as their support makes  
526 biological and mathematical sense) and converge to the same estimates (Lele *et al.*,  
527 2007). Also, the DC approach has the advantage that one can easily assess parameter  
528 identifiability for hierarchical models and determine when the model has too many hi-  
529 erarchy levels. Here, we demonstrated that all the Beta N-mixture model parameters  
530 are identifiable using Lele *et al.* (2010)'s approach.

531       Because our model is essentially identical to any N-mixture model, it can be  
532 adapted to any underlying distribution of abundances, although computational com-  
533 plications might arise in parameter estimation. Ecological inferences can be made by  
534 incorporating covariates into the abundance process as previously suggested (Joseph  
535 *et al.*, 2009; Yamaura *et al.*, 2011, 2012). For example, when sampling along environ-  
536 mental gradients, the density of species ( $\lambda$ ) might change as a function of the gradient.  
537 In this case,  $\lambda$  might be estimated as a linear combination of the variables changing  
538 along the gradient. The detection process can also depend on variables influencing  
539 the overall detectability of species (Dorazio *et al.*, 2013). One can assume that the de-  
540 tection probability distribution is a function of the functional groups or microhabitat  
541 and other species' intrinsic characteristics that might be evolutionarily constrained  
542 (Yamaura *et al.*, 2011, 2012; Ruiz-Gutiérrez *et al.*, 2010). Model selection compar-  
543 ing models with and without abundance and detection covariates can be useful for  
544 inferring ecological mechanisms underlying the abundance of species (Joseph *et al.*,

2009). In this case, ML estimation through DC is an extremely useful procedure because it allows model selection through traditional information criteria (Ponciano *et al.*, 2009). In the Beta N-mixture model, the assumption of the correlated behavior can be tested by comparing it to a regular N-mixture model, and because the main difference is in the assumptions underlying detection probability, it allows us to make inferences about ecological similarity among species. Our simulations described in section 2.2.2, however, use a uniform distribution for  $p_s$  to generate the count data with which parameters were estimated. Such a model violates the assumption of correlated detection probabilities, but the flexibility of the beta and logit-normal distributions allow us to estimate the parameters underlying the species' counts.

The estimates of the density of the understory insectivores of the upper Magdalena Valley show few differences between the Beta and Normal N-mixture models, except for the density of rare species (Table 2). Although the differences seem negligible at first glance, they make a big difference in the fit of the model. The  $\Delta AIC$  suggested that the Beta model is by far a better fit than the Normal model for this data set, even when accounting for the larger number of parameters of the Beta model. Appropriately estimating the abundance of extremely rare species has a disproportionate effect on the fit of the models evaluated.

The abundance of more common species with higher numbers of detections in our dataset might be a little higher than in other published data sets (Karr *et al.*, 1990). There are two possible reasons for this overestimation. First, when the mean detection probability of the species is low, our simulations showed that the Beta model overestimated the true abundance of species (Figure A3). Second, the data presented here comes from the dry forests of the Magdalena valley. Even though this ecosystem has lower species richness than wet forests, the biomass of the community does not change (Gomez *et al.* unpublished data). Populations of most species might be higher than in wet forests from which most of the abundance data for neotropical



572 birds has been collected (Terborgh *et al.*, 1990; Thiollay, 1994; Robinson *et al.*, 2000;  
573 Blake, 2007).

574         The categorical abundance estimates from Parker III *et al.* (1996) compared  
575 to the estimates using both Beta and Normal models are similar. In particular, Table  
576 2 shows that for most of the species that are categorized as common (C) and fairly  
577 common (F) by Parker III *et al.* (1996), the models estimate abundances to be greater  
578 than 30 individuals/100 ha. The most exciting result is the appropriate estimation of  
579 extremely rare species (*e.g.*, *Dromococcyx phasianellus*), which the models accurately  
580 estimate as being rare with only 1 or 2 detections in the entire data set. These are  
581 the species that are not well estimated by the single-species models.

582         One of the caveats of our model is that it does not take into account unseen  
583 species (i.e., species present in the study area that are not detected during the survey).  
584 Some solutions have been suggested in a multi-species framework that would allow  
585 the estimation of at least the number of unseen species for appropriate description  
586 of the community (Dorazio & Royle, 2005; Tingley & Beissinger, 2013). Such solu-  
587 tions estimate the number of unseen species using occupancy modeling, but to our  
588 knowledge there are no solutions available when modeling the abundance of species.  
589 We emphasize, however, that a reasonable first step towards the objective of accu-  
590 rately estimating tropical species abundance distributions is to properly estimate the  
591 abundance of species that have been detected at least once.

592         Our simulations have pushed the limits of community abundance models by  
593 simulating species with lower yet realistic abundances than any other simulation (see  
594 Yamaura *et al.*, 2016). We hope that our results encourage tropical ecologists to  
595 use community abundance hierarchical models as a means to adequately estimate the  
596 abundance of full communities. In the recent North American Ornithological congress  
597 (August 2016), two of us (JPG and SKR) participated in a discussion in which it  
598 became evident that tropical ornithologists are currently facing strong publishing

599 challenges because abundance estimating techniques have not explicitly targeted es-  
600 timation in a setting such as the tropics with very low abundances of the majority  
601 of the species and sparse counts. Unlike temperate forests, the number of species is  
602 typically very high in the tropics, but counts of individuals per species are very low.  
603 Even though our approach was developed using birds as a study system, our results  
604 suggest that it is possible to obtain reasonable estimates of the density of all of the  
605 species in a community of different taxonomic groups (*e.g.* mammals, insects, plants,  
606 fungi, bacteria). For example, in modeling disease ecology, it has been documented  
607 that abundance patterns in natural parasite communities is determined by host popu-  
608 lation densities, making host abundance estimation a crucial step to understand rare  
609 disease dynamics (Arneberg *et al.*, 1998, *e.g.* ebola or avian influenza). Unbiased  
610 estimation of abundances using these hierarchical models should enable researchers  
611 to build more accurate species abundance distributions and thus seek a better under-  
612 standing of the mechanisms governing biodiversity patterns (McGill *et al.*, 2007).

## 613 **5 Acknowledgements**

614 We would like to thank the farm owners Cesar Garcia, Hacienda los Limones and Con-  
615 stanza Mendoza for allowing us to perform bird counts in their properties. G.Burleigh,  
616 B.Loiselle, D.Steadman, P.Shirk, associate editor and three anonymous reviewers pro-  
617 vided useful comments for the development of the model and improvement of the  
618 manuscript. This work was supported by the National Institutes of Health Grant  
619 1R01GM117617-01 to JKB (PI) and JMP (Co-PI).

## 620 **6 Author Contributions**

621 JPG and JMP conceived the ideas and designed methodology; JPG collected the data;  
622 JPG and JMP analyzed the data; JPG and JMP led the writing of the manuscript.

623 SKR and JKB contributed critically to the drafts and gave final approval for publi-  
624 cation.

## 625 **References**

626 Arneberg, P., Skorpung, A., Grenfell, B. & Read, A.F. (1998) Host densities as deter-  
627 minants of abundance in parasite communities. *Proceedings of the Royal Society of*  
628 *London B: Biological Sciences*, **265**, 1283–1289.

629 Barnagaud, J.Y., Barbaro, L., Papaïx, J., Deconchat, M. & Brockerhoff, E.G. (2014)  
630 Habitat filtering by landscape and local forest composition in native and exotic  
631 new zealand birds. *Ecology*, **95**, 78–87.

632 Bibby, C.J., Burgess, N.D., Hill, D.A. & Mustoe, S. (2000) *Bird Census Techniques*.  
633 Elsevier, second edition edition.

634 Blake, J.G. (2007) Neotropical forest bird communities: a comparison of species rich-  
635 ness and composition at local and regional scales. *The Condor*, **109**, 237–255.

636 Chandler, R.B., King, D.I., Raudales, R., Trubey, R., Chandler, C. & Arce Chávez,  
637 V.J. (2013) A small-scale land-sparing approach to conserving biological diversity  
638 in tropical agricultural landscapes. *Conservation Biology*, **27**, 785–795.

639 Cressie, N., Calder, C.A., Clark, J.S., Hoef, J.M.V. & Wikle, C.K. (2009) Accounting  
640 for uncertainty in ecological analysis: the strengths and limitations of hierarchical  
641 statistical modeling. *Ecological Applications*, **19**, 553–570.

642 de Valpine, P. (2012) Frequentist analysis of hierarchical models for population dy-  
643 namics and demographic data. *Journal of Ornithology*, **152**, 393–408.

644 Denes, F.V., Silveira, L.F. & Beissinger, S.R. (2015) Estimating abundance of un-

645 marked animal populations: accounting for imperfect detection and other sources  
646 of zero inflation. *Methods in Ecology and Evolution*, **6**, 543–556.

647 Dorazio, R.M. (2016) Bayesian data analysis in population ecology: motivations,  
648 methods, and benefits. *Population Ecology*, **58**, 31–44.

649 Dorazio, R.M., Martin, J. & Edwards, H.H. (2013) Estimating abundance while ac-  
650 counting for rarity, correlated behavior, and other sources of variation in counts.  
651 *Ecology*, **94**, 1472–1478.

652 Dorazio, R.M. & Royle, J.A. (2005) Estimating size and composition of biological  
653 communities by modeling the occurrence of species. *Journal of the American Sta-  
654 tistical Association*, **100**, 389–398.

655 Hafley, W. & Schreuder, H. (1977) Statistical distributions for fitting diameter and  
656 height data in even-aged stands. *Canadian Journal of Forest Research*, **7**, 481–487.

657 Hubbell, S.P. (2001) *The unified neutral theory of biodiversity and biogeography*, vol-  
658 ume 32. Princeton University Press, Princeton, NY.

659 Hutto, R.L., Pletschet, S.M. & Hendricks, P. (1986) A fixed-radius point count  
660 method for nonbreeding and breeding season use. *The Auk*, **103**, 593 – 602.

661 Iknayan, K.J., Tingley, M.W., Furnas, B.J. & Beissinger, S.R. (2014) Detecting diver-  
662 sity: emerging methods to estimate species diversity. *Trends in ecology & evolution*,  
663 **29**, 97–106.

664 Joseph, L.N., Elkin, C., Martin, T.G. & Possingham, H.P. (2009) Modeling abun-  
665 dance using n-mixture models: the importance of considering ecological mecha-  
666 nisms. *Ecological Applications*, **19**, 631–642.

667 Karr, J.R., Robinson, S.K., Blake, J.G., Bierregaard Jr, R.O. & Gentry, A. (1990)

668 Birds of four neotropical forests. A.H. Gentry, ed., *Four neotropical rainforests*, pp.  
669 237–269. Yale University Press New Haven, Connecticut.

670 Leibold, M.A., Holyoak, M., Mouquet, N., Amarasekare, P., Chase, J.M., Hoopes,  
671 M.F., Holt, R.D., Shurin, J.B., Law, R., Tilman, D. *et al.* (2004) The metacom-  
672 munity concept: a framework for multi-scale community ecology. *Ecology letters*,  
673 **7**, 601–613.

674 Lele, S.R. & Dennis, B. (2009) Bayesian methods for hierarchical models: are ecolo-  
675 gists making a faustian bargain. *Ecological Applications*, **19**, 581–584.

676 Lele, S.R., Dennis, B. & Lutscher, F. (2007) Data cloning: easy maximum likelihood  
677 estimation for complex ecological models using bayesian markov chain monte carlo  
678 methods. *Ecology letters*, **10**, 551–563.

679 Lele, S.R., Nadeem, K. & Schmuland, B. (2010) Estimability and likelihood inference  
680 for generalized linear mixed models using data cloning. *Journal of the American*  
681 *Statistical Association*, **105**, 1617–1625.

682 MacKenzie, D.I., Nichols, J.D., Lachman, G.B., Droege, S., Andrew Royle, J. & Lang-  
683 timm, C.A. (2002) Estimating site occupancy rates when detection probabilities are  
684 less than one. *Ecology*, **83**, 2248–2255.

685 Margules, C.R. & Pressey, R.L. (2000) Systematic conservation planning. *Nature*,  
686 **405**, 243–253.

687 Martin, J., Royle, J.A., Mackenzie, D.I., Edwards, H.H., Kery, M. & Gardner, B.  
688 (2011) Accounting for non-independent detection when estimating abundance of  
689 organisms with a bayesian approach. *Methods in Ecology and Evolution*, **2**, 595–  
690 601.

- 691 Martin, T.G., Wintle, B.A., Rhodes, J.R., Kuhnert, P.M., Field, S.A., Low-Choy,  
692 S.J., Tyre, A.J. & Possingham, H.P. (2005) Zero tolerance ecology: improving  
693 ecological inference by modeling the source of zero observations. *Ecology letters*, **8**,  
694 1235–1246.
- 695 McGill, B.J., Etienne, R.S., Gray, J.S., Alonso, D., Anderson, M.J., Benecha, H.K.,  
696 Dornelas, M., Enquist, B.J., Green, J.L., He, F., Hurlbert, A.H., Magurran, A.E.,  
697 Marquet, P.A., Maurer, B.A., Ostling, A., Soykan, C.U., Ugland, K.I. & White,  
698 E.P. (2007) Species abundance distributions: moving beyond single prediction the-  
699 ories to integration within an ecological framework. *Ecology letters*, **10**, 995–1015.
- 700 Ovaskainen, O. & Soininen, J. (2011) Making more out of sparse data: hierarchical  
701 modeling of species communities. *Ecology*, **92**, 289–295.
- 702 Parker III, T., Stotz, D. & Fitzpatrick, J. (1996) Ecological and distributional  
703 databases for neotropical birds. D. Stotz, J. Fitzpatrick, T. Parker III &  
704 D. Moskovits, eds., *Neotropical birds: ecology and conservation*. University of  
705 Chicago Press, Chicago.
- 706 Plummer, M. (2014) *rjags: Bayesian graphical models using MCMC*. R package  
707 version 3-13.
- 708 Ponciano, J.M., Burleigh, J.G., Braun, E.L. & Taper, M.L. (2012) Assessing param-  
709 eter identifiability in phylogenetic models using data cloning. *Systematic biology*,  
710 **61**, 955–972.
- 711 Ponciano, J.M., Taper, M.L., Dennis, B. & Lele, S.R. (2009) Hierarchical models in  
712 ecology: confidence intervals, hypothesis testing, and model selection using data  
713 cloning. *Ecology*, **90**, 356–362.
- 714 R Core Team (2013) *R: A Language and Environment for Statistical Computing*. R  
715 Foundation for Statistical Computing, Vienna, Austria.

- 716 Robinson, W.D., Brawn, J.D. & Robinson, S.K. (2000) Forest bird community struc-  
717 ture in central panama: influence of spatial scale and biogeography. *Ecological*  
718 *Monographs*, **70**, 209–235.
- 719 Royle, J.A. (2004) N-mixture models for estimating population size from spatially  
720 replicated counts. *Biometrics*, **60**, 108–115.
- 721 Royle, J.A. & Dorazio, R.M. (2008) *Hierarchical modeling and inference in ecology:*  
722 *the analysis of data from populations, metapopulations and communities*. Academic  
723 Press, San Diego, CA.
- 724 Ruiz-Gutiérrez, V., Zipkin, E.F. & Dhondt, A.A. (2010) Occupancy dynamics in a  
725 tropical bird community: unexpectedly high forest use by birds classified as non-  
726 forest species. *Journal of Applied Ecology*, **47**, 621–630.
- 727 Sauer, J.R. & Link, W.A. (2002) Hierarchical modeling of population stability and  
728 species group attributes from survey data. *Ecology*, **83**, 1743–1751.
- 729 Seabloom, E.W., Borer, E.T., Gross, K., Kendig, A.E., Lacroix, C., Mitchell, C.E.,  
730 Mordecai, E.A. & Power, A.G. (2015) The community ecology of pathogens: coin-  
731 fection, coexistence and community composition. *Ecology letters*, **18**, 401–415.
- 732 Sibuya, M., Yoshimura, I. & Shimizu, R. (1964) Negative multinomial distribution.  
733 *Annals of the Institute of Statistical Mathematics*, **16**, 409–426.
- 734 Stratford, J.A. & Robinson, W.D. (2005) Gulliver travels to the fragmented tropics:  
735 geographic variation in mechanisms of avian extinction. *Frontiers in Ecology and*  
736 *the Environment*, **3**, 85–92.
- 737 Taper, M.L. & Ponciano, J.M. (2016) Evidential statistics as a statistical modern  
738 synthesis to support 21st century science. *Population Ecology*, **58**, 9–29.

- 739 Terborgh, J., Robinson, S.K., Parker III, T.A., Munn, C.A. & Pierpont, N. (1990)  
740 Structure and organization of an amazonian forest bird community. *Ecological*  
741 *Monographs*, **60**, 213–238.
- 742 Thiollay, J.M. (1994) Structure, density and rarity in an amazonian rainforest bird  
743 community. *Journal of Tropical Ecology*, **10**, 449–481.
- 744 Tingley, M.W. & Beissinger, S.R. (2013) Cryptic loss of montane avian richness and  
745 high community turnover over 100 years. *Ecology*, **94**, 598 – 609.
- 746 Tuyl, F., Gerlach, R. & Mengersen, K. (2008) A comparison of bayes–laplace, jeffreys,  
747 and other priors: The case of zero events. *The American Statistician*, **62**, 40–44.
- 748 Yamaura, Y. (2013) Confronting imperfect detection: behavior of binomial mixture  
749 models under varying circumstances of visits, sampling sites, detectability, and  
750 abundance, in small-sample situations. *Ornithological Science*, **12**, 73 – 78.
- 751 Yamaura, Y., Andrew Royle, J., Kuboi, K., Tada, T., Ikeno, S. & Makino, S. (2011)  
752 Modelling community dynamics based on species-level abundance models from de-  
753 tection/nondetection data. *Journal of applied ecology*, **48**, 67–75.
- 754 Yamaura, Y., Kéry, M. & Royle, J.A. (2016) Study of biological communities sub-  
755 ject to imperfect detection: bias and precision of community n-mixture abundance  
756 models in small-sample situations. *Ecological Research*, **31**, 289–305.
- 757 Yamaura, Y., Royle, J.A., Shimada, N., Asanuma, S., Sato, T., Taki, H. & Makino,  
758 S. (2012) Biodiversity of man-made open habitats in an underused country: a class  
759 of multispecies abundance models for count data. *Biodiversity and Conservation*,  
760 **21**, 1365–1380.
- 761 Zipkin, E.F., DeWan, A. & Andrew Royle, J. (2009) Impacts of forest fragmentation



762 on species richness: a hierarchical approach to community modelling. *Journal of*  
763 *Applied Ecology*, **46**, 815–822.

764 **7 Tables**

| Model          | Data                                                                                                                                                                                                                    | Statistical Model                                                                                                                                                                                                                                                   |
|----------------|-------------------------------------------------------------------------------------------------------------------------------------------------------------------------------------------------------------------------|---------------------------------------------------------------------------------------------------------------------------------------------------------------------------------------------------------------------------------------------------------------------|
| Single-Species | $\mathbf{Y} = \begin{pmatrix} y_{1,1} & y_{1,2} & \cdots & y_{1,t} \\ y_{2,1} & y_{i,j} & \cdots & \vdots \\ \vdots & \vdots & \ddots & \vdots \\ y_{r,1} & y_{r,2} & \cdots & y_{r,t} \end{pmatrix}$                   | $y_{ij} \sim \text{Bin}(n_i, p)$<br>$N_i \sim \text{Pois}(\lambda)$<br>$\lambda$ parameter (fixed)<br>$p$ parameter (fixed)                                                                                                                                         |
| Multi-Species  | $\mathbf{Y}_1 = \begin{pmatrix} y_{1,1,1} & y_{1,1,2} & \cdots & y_{1,1,t} \\ y_{1,2,1} & y_{1,i,j} & \cdots & \vdots \\ \vdots & \vdots & \ddots & \vdots \\ y_{1,r,1} & y_{1,r,2} & \cdots & y_{1,r,t} \end{pmatrix}$ | <b>Beta Model</b><br>$y_{sij} \sim \text{Bin}(n_{si}, p_s)$<br>$N_{si} \sim \text{Pois}(\lambda_s)$<br>$\lambda_1, \lambda_2, \dots, \lambda_S$ parameter (fixed)<br>$p_1, p_2, \dots, p_S \sim \text{Beta}(\bar{p}, \tau)$                                         |
|                | $\mathbf{Y}_2 = \begin{pmatrix} y_{2,1,1} & y_{2,1,2} & \cdots & y_{2,1,t} \\ y_{2,2,1} & y_{2,i,j} & \cdots & \vdots \\ \vdots & \vdots & \ddots & \vdots \\ y_{2,r,1} & y_{2,r,2} & \cdots & y_{2,r,t} \end{pmatrix}$ | <b>Normal Model</b><br>$y_{sij} \sim \text{Bin}(n_{si}, p_s)$<br>$N_{si} \sim \text{Pois}(\lambda_s)$<br>$\lambda_1, \lambda_2, \dots, \lambda_S \sim \exp(\mathcal{N}(\mu_a, \sigma_a))$<br>$p_1, p_2, \dots, p_S \sim \text{logit}(\mathcal{N}(\mu_p, \sigma_p))$ |
|                | $\mathbf{Y}_S = \begin{pmatrix} y_{s,1,1} & y_{s,1,2} & \cdots & y_{s,1,t} \\ y_{s,2,1} & y_{s,i,j} & \cdots & \vdots \\ \vdots & \vdots & \ddots & \vdots \\ y_{s,r,1} & y_{s,r,2} & \cdots & y_{s,r,t} \end{pmatrix}$ | <b>Model for simulation</b><br>$y_{sij} \sim \text{Bin}(n_{si}, p_s)$<br>$N_{si} \sim \text{Pois}(\lambda_s)$<br>$\lambda_1, \lambda_2, \dots, \lambda_S \sim \text{Gamma}(\alpha = 0.65, \beta = 0.033)$<br>$p_1, p_2, \dots, p_S \sim \text{Unif}(0, 1)$          |

Table 1: Summary of single and multi-species models used in this study. We also describe the model used to generate the simulated data for comparison between the multi-species models.  $y$  represents the observed counts,  $N$  the random variable of unobserved number of individuals  $n$  available for detection in plot  $i$ ,  $p$  the detection probability, and  $\lambda$  the density of species  $s$ .

| Species                               | Det | Parker | Yamaura model |       |       | Beta model |       |       |
|---------------------------------------|-----|--------|---------------|-------|-------|------------|-------|-------|
|                                       |     |        | 97.5%         | Mean  | 2.5%  | 97.5%      | MLE   | 2.5%  |
| <i>Atalotriccus pilaris</i>           | 83  | F      | 97.3          | 145.2 | 206.1 | 71.3       | 122.8 | 174.3 |
| <i>Basileuterus rufifrons</i>         | 104 | C      | 146.4         | 208.6 | 300.9 | 111.2      | 204.3 | 297.3 |
| <i>Campylorhynchus griseus</i>        | 7   | C      | 5.0           | 14.5  | 30.1  | 0.0        | 11.2  | 22.5  |
| <i>Cantorchilus leucotis</i>          | 3   | C      | 2.9           | 10.3  | 24.1  | 0.0        | 8.2   | 19.5  |
| <i>Cnemotriccus fuscatus</i>          | 31  | F      | 39.3          | 67.0  | 110.9 | 24.3       | 67.2  | 110.2 |
| <i>Contopus cinereus</i>              | 2   | F/P    | 1.7           | 7.8   | 19.8  | 0.0        | 5.2   | 13.4  |
| <i>Cymbilaimus lineatus</i>           | 4   | F      | 4.1           | 12.9  | 28.8  | 0.0        | 11.3  | 25.0  |
| <i>Dromococcyx phasianellus</i>       | 1   | U      | 0.8           | 5.5   | 15.8  | 0.0        | 2.5   | 7.7   |
| <i>Elaenia flavogaster</i>            | 67  | C      | 107.9         | 162.8 | 260.6 | 85.7       | 192.3 | 298.8 |
| <i>Euscarthmus meloryphus</i>         | 26  | C      | 28.1          | 49.8  | 81.0  | 17.3       | 44.3  | 71.3  |
| <i>Formicivora grisea</i>             | 172 | C      | 225.4         | 315.0 | 433.1 | 172.6      | 279.0 | 385.4 |
| <i>Hemitriccus margaritaceiventer</i> | 106 | C      | 104.2         | 161.6 | 231.4 | 83.6       | 124.4 | 165.1 |
| <i>Henicorhina leucosticta</i>        | 28  | F      | 37.7          | 65.8  | 113.6 | 20.9       | 70.9  | 121.0 |
| <i>Hylophilus flavipes</i>            | 144 | C      | 236.1         | 344.8 | 580.2 | 134.1      | 445.8 | 757.5 |
| <i>Leptopogon amaurocephalus</i>      | 23  | F      | 27.0          | 49.1  | 83.4  | 15.1       | 47.1  | 79.2  |
| <i>Myrmeciza longipes</i>             | 64  | C      | 81.2          | 121.6 | 178.9 | 60.1       | 111.6 | 163.1 |
| <i>Myrmotherula pacifica</i>          | 1   | F      | 0.8           | 5.5   | 15.4  | 0.0        | 2.5   | 7.5   |
| <i>Pheugopedius fasciatoventris</i>   | 83  | F      | 114.0         | 164.2 | 237.2 | 85.9       | 157.3 | 228.7 |
| <i>Poecilatriccus sylvia</i>          | 69  | F      | 89.2          | 135.3 | 201.7 | 61.9       | 125.4 | 189.0 |
| <i>Ramphocaenus melanurus</i>         | 5   | F/P    | 3.8           | 12.3  | 27.3  | 0.0        | 9.7   | 20.9  |
| <i>Synallaxis albescens</i>           | 1   | C      | 0.8           | 5.6   | 15.6  | 0.0        | 2.5   | 7.5   |
| <i>Thamnophilus atrinucha</i>         | 93  | C      | 124.1         | 177.1 | 251.6 | 91.9       | 162.7 | 233.6 |
| <i>Thamnophilus doliatus</i>          | 192 | C      | 269.2         | 369.7 | 516.5 | 211.2      | 345.7 | 480.2 |
| <i>Todirostrum cinereum</i>           | 51  | C      | 63.2          | 97.6  | 144.3 | 46.9       | 89.5  | 132.2 |
| <i>Tolmomyias sulphurescens</i>       | 80  | F      | 110.8         | 162.1 | 240.4 | 80.8       | 157.1 | 233.3 |
| <i>Troglodytes aedon</i>              | 26  | C      | 25.6          | 45.8  | 74.3  | 15.7       | 38.5  | 61.3  |

Table 2: Estimates for understory insectivorous birds in the dry forest of the Magdalena Valley Colombia. Estimates are in individuals/100 ha. Det shows the number of detections of each species in the data set. We present the Upper and Lower values of the confidence interval for the Beta N-mixture model and credible interval for the Normal N-mixture model. Parker refers to the abundance category in the Parker III *et al.* (1996) database. U= Uncommon, C = Common, F= Fairly Common, F/P = Fairly common but with patchy distribution.

765 **8 Figures**

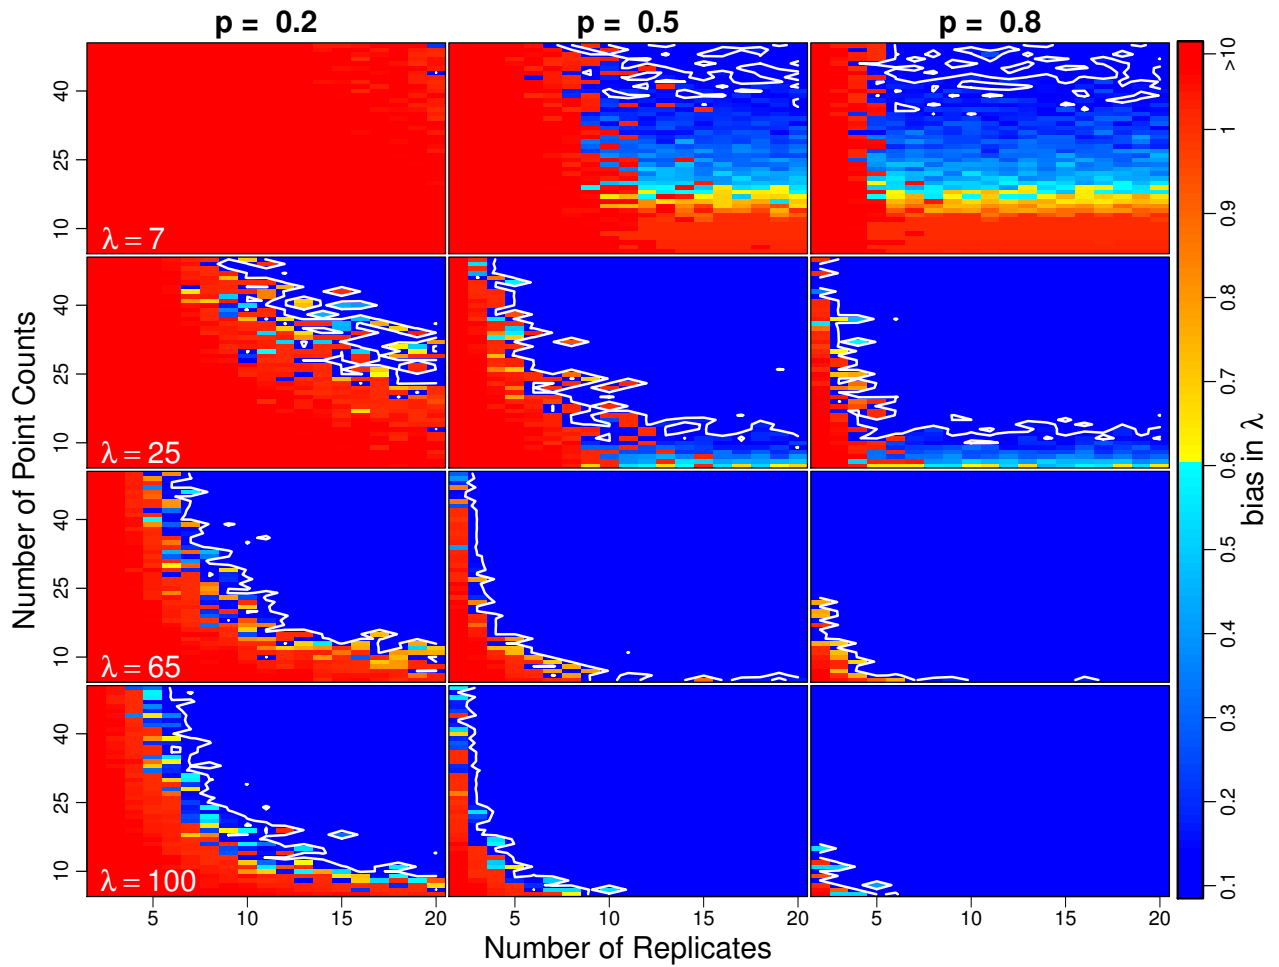

Figure 1: Mean bias in mean number of individuals per 100 ha  $\lambda$  ( $\text{bias} = \frac{\hat{\lambda} - \lambda}{\lambda}$ ) for a range of point counts, number of replicates, and true parameter values for mid low and high abundances and detection probabilities ( $\lambda = 7, 25, 65, 100$  and  $p = 0.2, 0.5, 0.8$ ). Colors in each panel represent the bias from low (blue) to high (red). The color scale is presented in the right. We selected a threshold for acceptable bias in estimation of abundance of 0.1 which isocline is presented as a white line in each of the panels. The results for the entire set of simulations are presented in a similar figure in appendix A

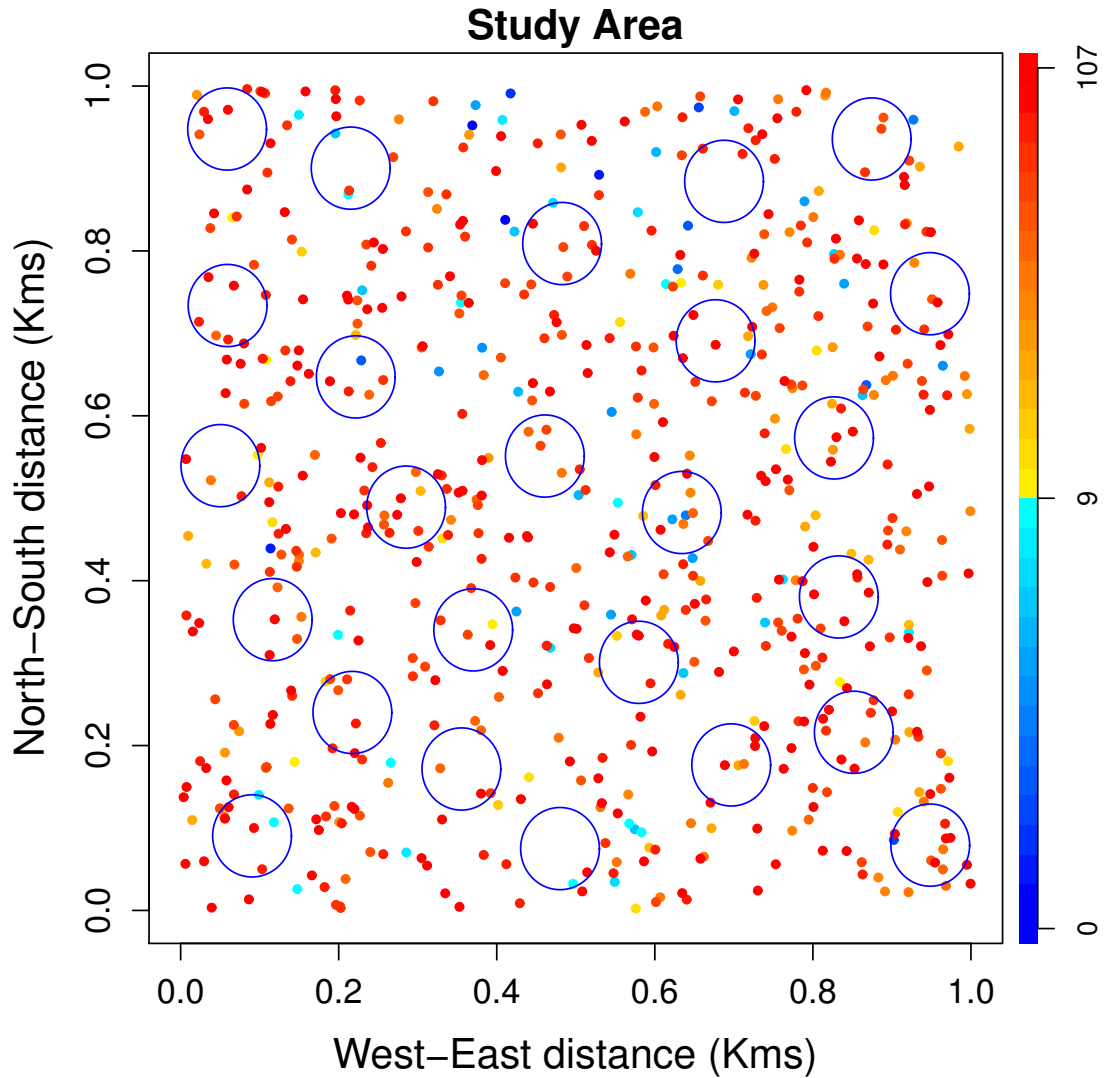

Figure 2: Graphic representation of the sampling design used to simulate the 500 count datasets of a community consisting of 27 species. We assumed the plot to be 100 ha ( $1 \text{ km}^2$ ) and circular sampling point to be of 0.78 ha ( $\sim 0.008 \text{ km}^2$ ). We show the true abundances in the plot represented by colors in the scale bar

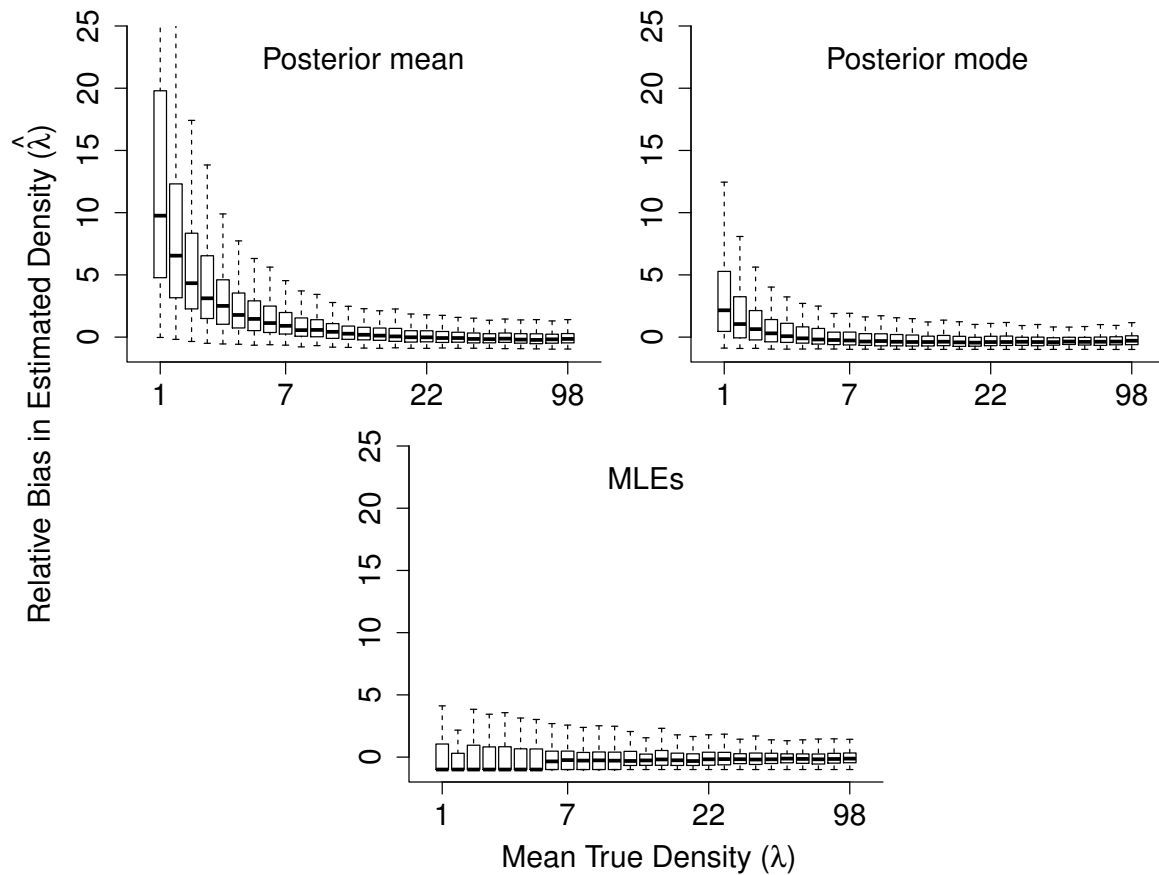

Figure 3: Relative bias in the estimated value of  $\lambda$  ( $(\text{Estimate}-\text{True})/\text{True}$ ) for both the Beta and Normal N-mixture model for 500 simulations of count data, for a community consisting of 27 species. We show the boxplots of the 500 posterior means and modes for the Normal model and the 500 Maximum Likelihood Estimates (MLEs) for the Beta model based on the same simulated data sets. The mean true abundances for each of the 27 species varied from 1 to 98 individuals/100 ha. Because there are 27 true abundances in the community the figure shows one boxplot for each species in the community.

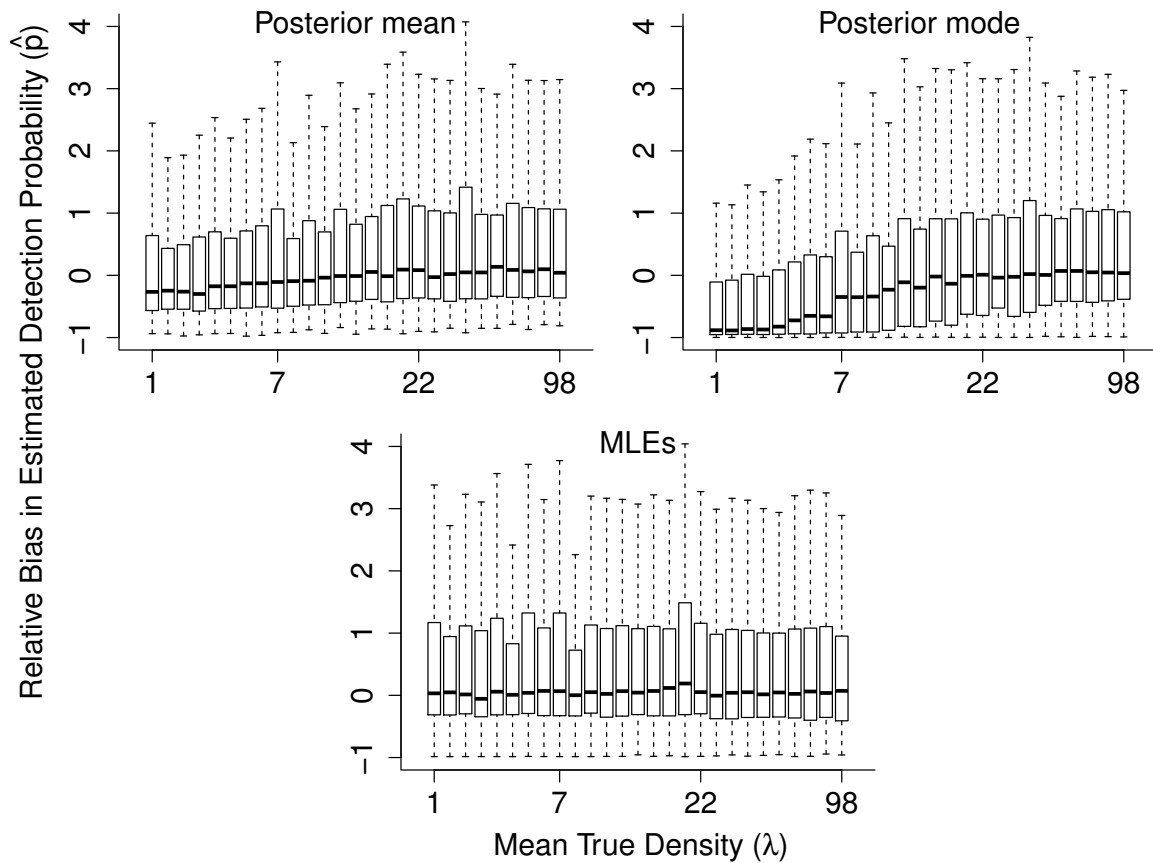

Figure 4: Relative bias in the estimated value of  $p_s$  ( $(\text{Estimate}-\text{True})/\text{True}$ ) as a function of the true abundance for both the Beta and Normal N-mixture model for 500 simulations of count data, for a community consisting of 27 species. We show the boxplots of the 500 posterior means and modes for the Normal model and the 500 Maximum Likelihood Estimates (MLEs) for the Beta model based on the same simulated data sets. The mean true abundances for each of the 27 species varies from about 1 to 98 individuals/100 ha. Because there are 27 true abundances in the community the figure shows one boxplot for each species in the community.



## 766 A Supplementary Figures

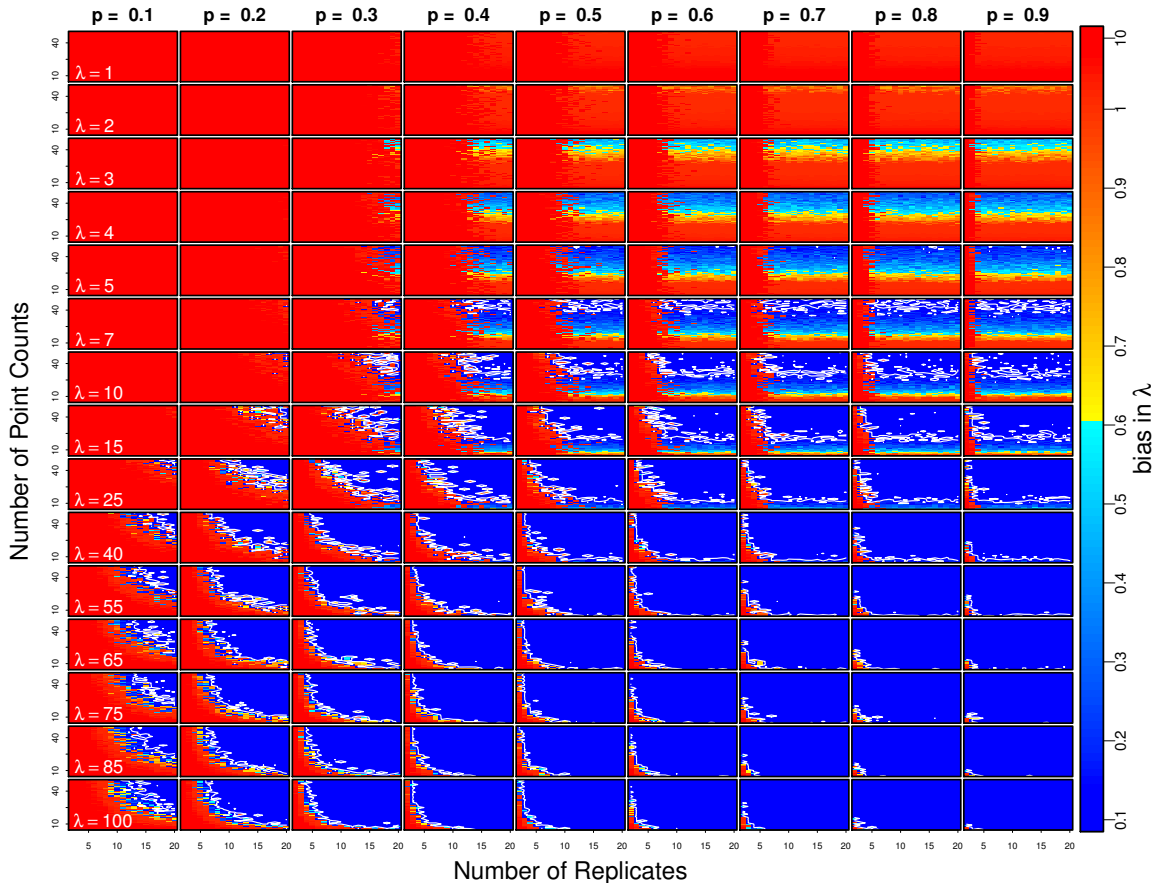

Figure A1: Mean bias in mean number of individuals per 100 ha  $\lambda$  ( $\text{bias} = \frac{\hat{\lambda} - \lambda}{\lambda}$ ) for a range of point counts, number of replicates, and true parameter values for mid low and high abundances and detection probabilities ( $\lambda = 7, 25, 65, 100$  and  $p = 0.2, 0.5, 0.8$ ). Colors in each panel represent the bias from low (blue) to high (red). The color scale is presented in the right. We selected a threshold for acceptable bias in estimation of abundance of 0.1 which isocline is presented as a white line in each of the panels.

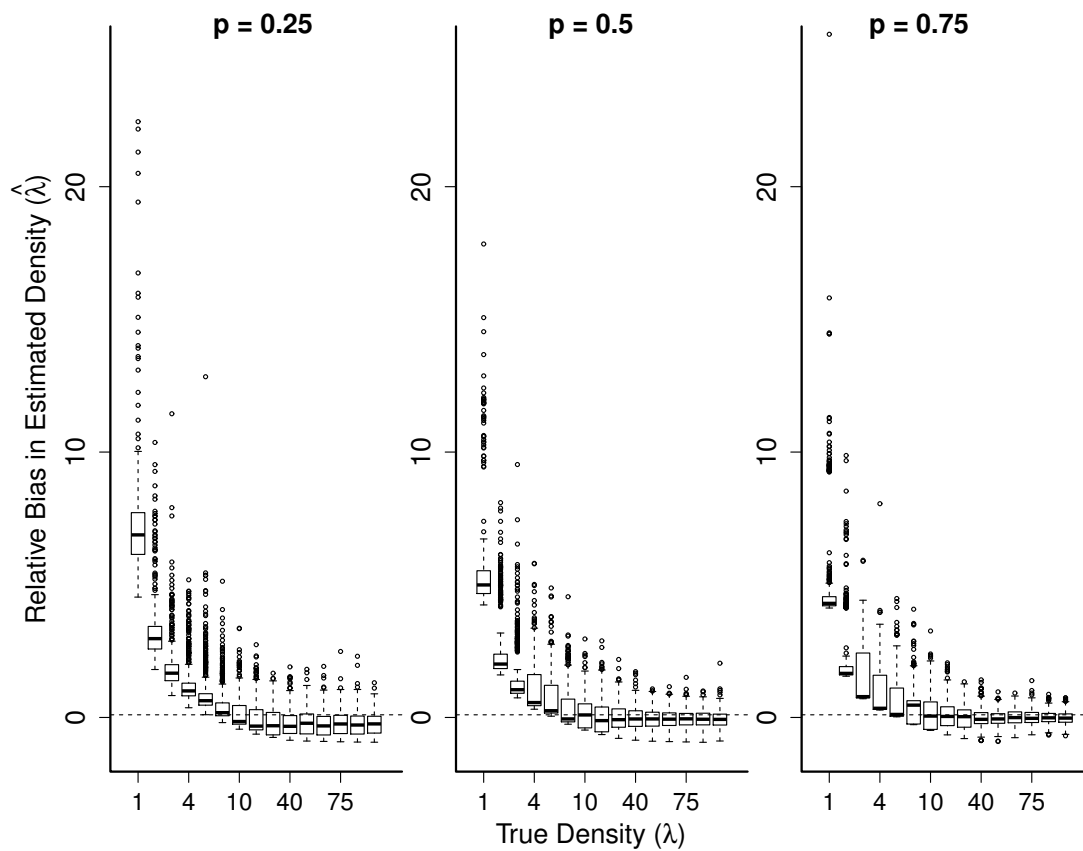

Figure A2: Boxplot showing the distribution of  $\hat{\lambda}$  using Beta N-mixture model, showing the location of the true value of  $\lambda$ .

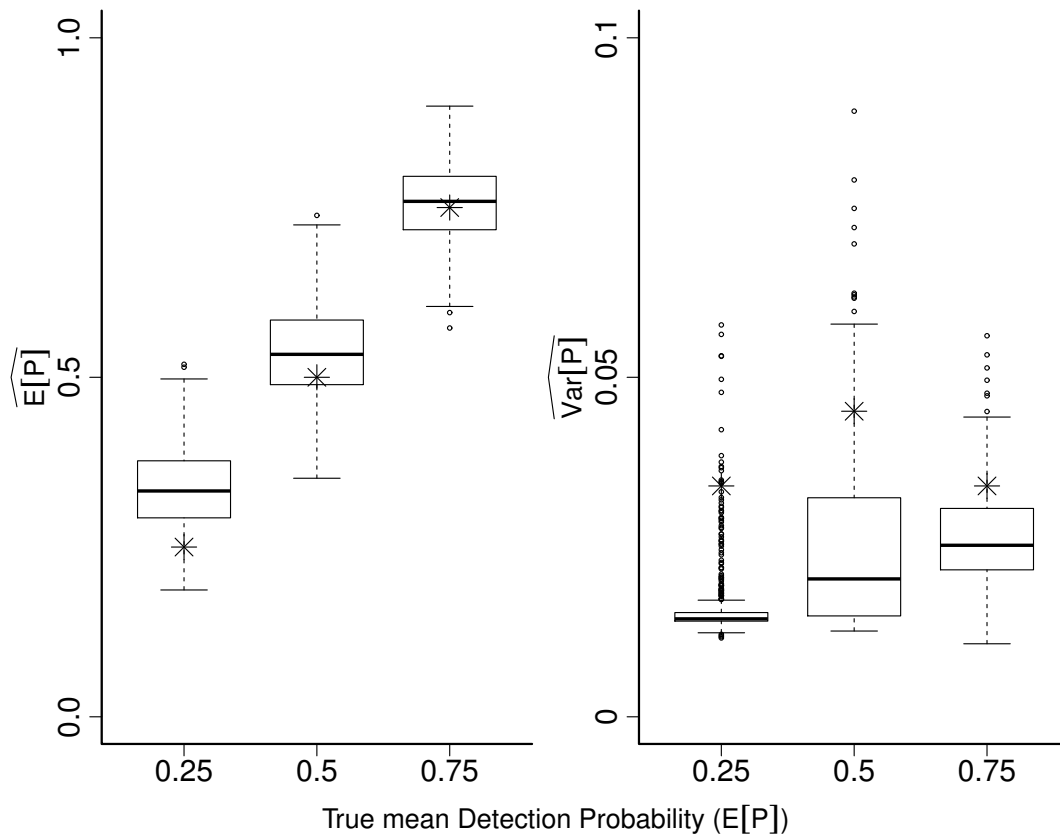

Figure A3: Boxplots showing the distribution of  $\widehat{E}[P]$  and  $\widehat{Var}[P]$  as a function of the true mean detection probability  $E[P]$  with which data was simulated.

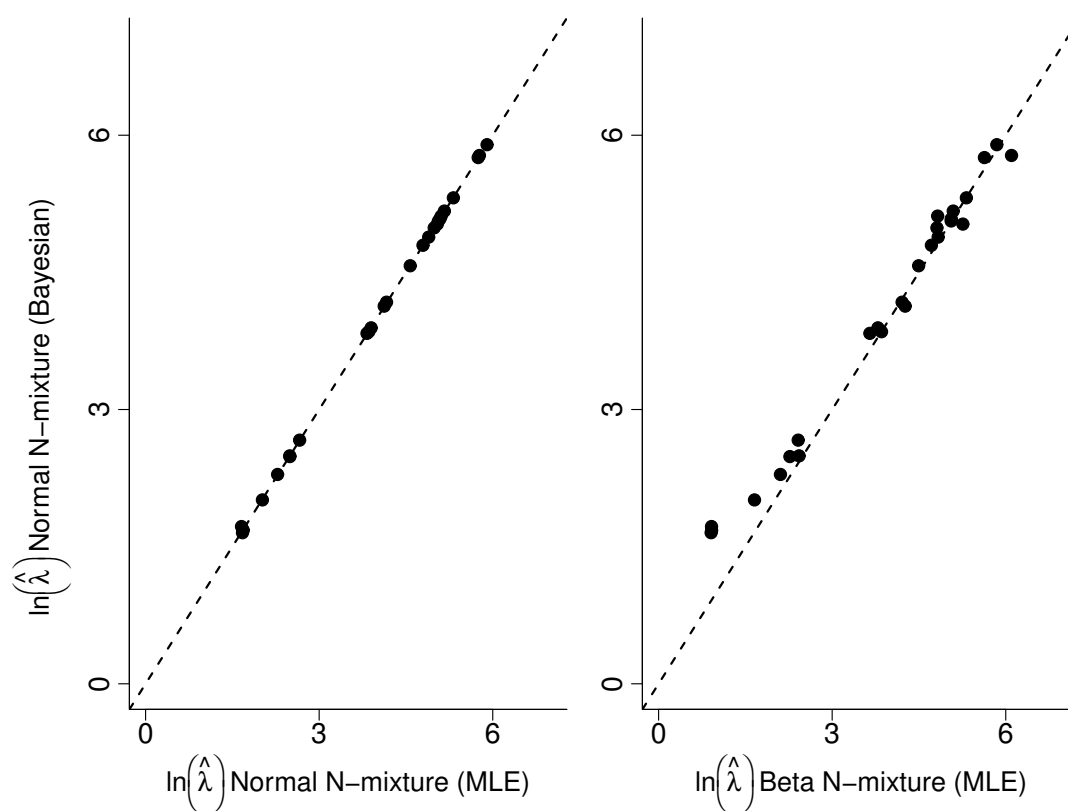

Figure A4: Comparison of  $\hat{\lambda}$  resulting from Bayesian and Maximum Likelihood estimations (MLE) of the Normal N-mixture model (left) and the estimates from the Normal and Beta N-mixture models (right)

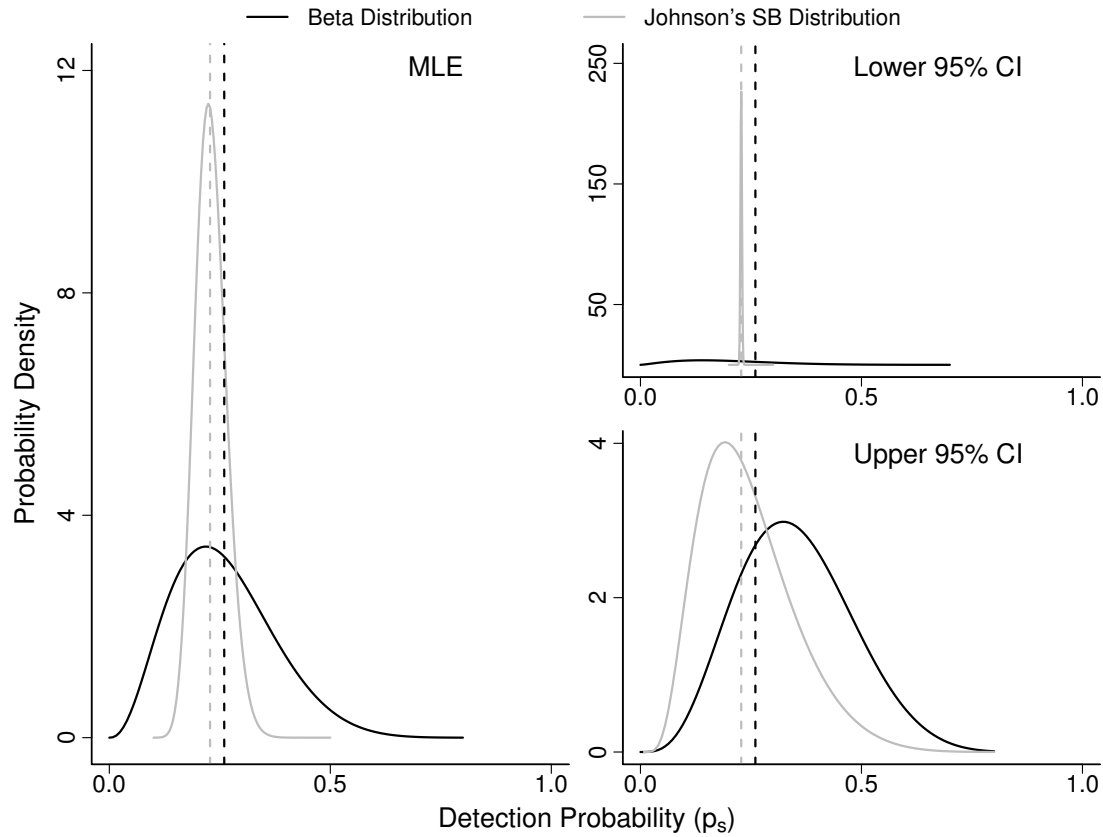

Figure A5: Probability distribution of the  $p_s$  estimated by the Beta (black) and Normal (gray) N-mixture models for a 26 species community in the dry forest of the Magdalena River Valley in Colombia. Dotted lines represent the upper and lower curves based on the 95% confidence intervals of the parameters estimated by the models. Johnson's SB distribution is the logit transformation of the normal distribution used to estimate detection probabilities.

## 767 **B R Code**

768 Appendix B contains the source codes necessary for estimating abundance using the  
769 Beta and Normal N-mixture models. It is based on bugs specification of the model,  
770 R functions for abundance estimation using N-mixture model are also provided in the  
771 code. The data to the three steps of the Beta N-mixture validation are separated in  
772 different .RData files. The data sets for the 1500 simulations with hi, mid and low  
773  $\bar{p}$  are saved in the bias.RData. The 500 data sets simulated under the complicated  
774 model used to compare the Beta and Normal N-mixture model along with the  $\lambda$  and  $p$   
775 used in each simulation are saved under the comparison.RData. The real count data  
776 from the point counts performed in central Colombia are saved in the file real.RData.  
777 The entire code is saved in the Gomez\_et\_al\_code.R from which all of the analysis  
778 of this paper can be easily replicated. The only step for which we did not save  
779 the simulated data was the bias estimation of the single species N-mixture model  
780 because of the large number of simulations performed. Using the code and function  
781 provided, however, the reader should be able to reproduce the simulations and the  
782 bias estimation.
